# Supplementary material
Source: publisher figshare collection journal article supplement (https://acs.figshare.com/ndownloader/files/5525618)

# Alkynyl Acylammoniums as Electrophilic 3C Synthons in a Formal [3+3] Annulation: Access to Functionalized 4*H*-Pyran-4-ones

Shuding Dong, Chao Fang, Weifang Tang, Tao Lu\* and Ding Du\*

*State Key Laboratory of Natural Medicines, Department of Organic Chemistry, China Pharmaceutical University, Nanjing, 210009, P. R. China.*

*E-mail: lut163@163.com and ddmn9999@cpu.edu.cn*

|                                                                                                         |     |
|---------------------------------------------------------------------------------------------------------|-----|
| General Methods and Materials-----                                                                      | S2  |
| General procedure for the synthesis of $\gamma$ -pyrones <b>3/5</b> or $\alpha$ -pyrones <b>4</b> ----- | S2  |
| Procedure for the synthesis of compound <b>6</b> from <b>3a</b> or <b>3g</b> -----                      | S9  |
| Procedure for the synthesis of compound <b>9</b> -----                                                  | S9  |
| Procedure for the synthesis of compound <b>10</b> -----                                                 | S10 |
| Procedure for the synthesis of compound <b>11</b> -----                                                 | S11 |
| Procedure for the synthesis of product <b>3g</b> from acid chloride-----                                | S11 |
| Procedure for the reaction of alkynyl acyl imidazole <b>12</b> with <b>2g</b> -----                     | S12 |
| Copies of NMR spectra for products <b>3</b> -----                                                       | S13 |
| Copy of NMR spectra for products <b>4</b> -----                                                         | S36 |
| Copies of NMR spectra for product <b>5</b> -----                                                        | S39 |
| Copies of NMR spectra for compound <b>6</b> -----                                                       | S40 |
| Copies of NMR spectra for compound <b>9</b> -----                                                       | S41 |
| Copies of NMR spectra for compound <b>10</b> -----                                                      | S42 |
| Copies of NMR spectra for compound <b>11</b> -----                                                      | S43 |

**General Methods and Materials.** All reactions were carried out in dry glassware, and were monitored by analytical thin-layer chromatography (TLC), which was visualized by ultraviolet light (254 nm). All solvents were obtained from commercial sources and were purified according to standard procedures. Alkynyl carboxylic acids **1**<sup>[1]</sup> and substrates **2**<sup>[2]</sup> are commercially available or prepared according to known procedures. Compound **12** was prepared from acyl chloride and imidazole according to the known procedure.<sup>[3]</sup> Purification of the products was accomplished by flash chromatography using silica gel (200-300 mesh). All NMR spectra were recorded on Bruker spectrometers, running at 300 MHz or 500 MHz for <sup>1</sup>H and 75 MHz or 125 MHz for <sup>13</sup>C respectively. Chemical shifts ( $\delta$ ) and coupling constants ( $J$ ) are reported in ppm and Hz respectively. The solvent signals were used as references (residual CHCl<sub>3</sub> in CDCl<sub>3</sub>:  $\delta_{\text{H}}$  = 7.26 ppm,  $\delta_{\text{C}}$  = 77.0 ppm). The following abbreviations are used to indicate the multiplicity in NMR spectra: s (singlet); d (doublet); t (triplet); q (quartet); m (multiplet). High resolution mass spectrometry (HRMS) was recorded on TOF perimer for ESI<sup>+</sup>.

**General procedure for the synthesis of  $\gamma$ -pyrones **3/5** or  $\alpha$ -pyrones **4**:**

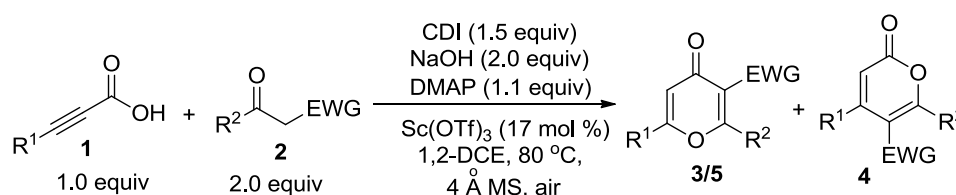

To an oven-dried 25 mL round-bottom flask was charged with acid **1** (0.35 mmol), substrate **2** (0.7 mmol), CDI (97 mg, 0.6 mmol), DMAP (51 mg, 0.385 mmol), Sc(OTf)<sub>3</sub> (30 mg, 0.06 mmol), 200 mg of 4 Å MS and NaOH (28 mg, 0.7 mmol). Then anhydrous 1,2-DCE (4 mL) was added to the flask and the resulting mixture was heated at 80 °C in air for a period time until the completion of the reaction as monitored by TLC. The mixture was cooled to room temperature. The mixture was filtered and the filtrate was concentrated under reduced pressure. The residue was purified by chromatography on silica gel using hexane/EtOAc (10:1) as the eluent to afford products **3/5** or **4**.

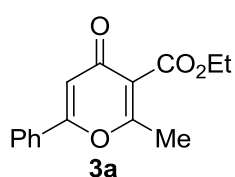

**Ethyl 2-methyl-4-oxo-6-phenyl-4H-pyran-3-carboxylate (**3a**).**

59 mg, 65% yield, white solid, mp: 105-106 °C. <sup>1</sup>H NMR (300 MHz, CDCl<sub>3</sub>):  $\delta$  7.74 (d,  $J$  = 6.3 Hz, 2H), 7.44-7.54 (m, 3H), 6.77

(s, 1H), 4.40 (q,  $J = 6.9$  Hz, 2H), 2.49 (s, 3H), 1.38 (t,  $J = 6.9$  Hz, 3H).  $^{13}\text{C}$  NMR (75 MHz,  $\text{CDCl}_3$ ):  $\delta$  175.7, 165.4, 164.5, 162.8, 131.4, 130.5, 128.9, 125.6, 121.6, 111.0, 61.6, 18.5, 14.0. HRMS (ESI) calcd for  $\text{C}_{15}\text{H}_{15}\text{O}_4$  ( $\text{M}+\text{H}$ ) $^+$ : 259.0965, found 259.0964.

**Methyl 2-methyl-4-oxo-6-phenyl-4H-pyran-3-carboxylate (3b).** 48 mg, 56% yield, white solid, mp: 130-131  $^\circ\text{C}$ .  $^1\text{H}$  NMR (500 MHz,  $\text{CDCl}_3$ ):  $\delta$

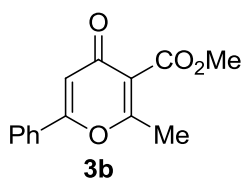

7.75 (d,  $J = 6.7$  Hz, 2H), 7.47-7.54 (m, 3H), 6.81 (s, 1H), 3.93 (s, 3H), 2.51 (s, 3H).  $^{13}\text{C}$  NMR (75 MHz,  $\text{CDCl}_3$ ):  $\delta$  175.8, 166.2, 165.1, 162.9, 131.6, 130.6, 129.1, 125.7, 121.3, 111.2, 52.6, 18.8.

HRMS (ESI) calcd for  $\text{C}_{14}\text{H}_{13}\text{O}_4$  ( $\text{M}+\text{H}$ ) $^+$ : 245.0808, found 245.0805.

**tert-Butyl 2-methyl-4-oxo-6-phenyl-4H-pyran-3-carboxylate (3c).** 41 mg, 41% yield, white solid, mp: 145-146  $^\circ\text{C}$ .  $^1\text{H}$  NMR (300 MHz,  $\text{CDCl}_3$ ):  $\delta$

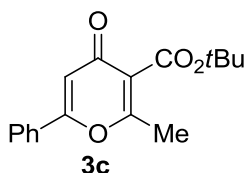

7.71-7.74 (m, 2H), 7.42-7.51 (m, 3H), 6.72 (s, 1H), 2.45 (s, 3H), 1.59 (s, 9H).  $^{13}\text{C}$  NMR (75 MHz,  $\text{CDCl}_3$ ):  $\delta$  175.9, 164.1, 163.8, 162.8, 131.4, 130.8, 129.0, 123.0, 111.3, 82.8, 28.1, 18.4.

HRMS (ESI) calcd for  $\text{C}_{17}\text{H}_{19}\text{O}_4$  ( $\text{M}+\text{H}$ ) $^+$ : 287.1278, found 287.1281.

**Benzyl 2-methyl-4-oxo-6-phenyl-4H-pyran-3-carboxylate (3d).** 65 mg, 58% yield, white solid, mp: 123-124  $^\circ\text{C}$ .  $^1\text{H}$  NMR (300 MHz,  $\text{CDCl}_3$ ):  $\delta$

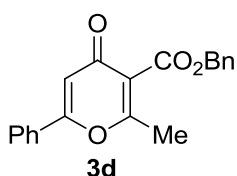

7.73-7.75 (m, 2H), 7.46-7.54 (m, 5H), 7.37-7.40 (m, 2H), 7.33 (m, 1H), 6.81 (s, 1H), 5.38 (s, 2H), 2.44 (s, 3H).  $^{13}\text{C}$  NMR (75 MHz,  $\text{CDCl}_3$ ):  $\delta$  175.8, 165.9, 164.5, 162.9, 135.4, 131.6, 130.6,

129.1, 128.6, 128.3, 125.8, 121.4, 111.2, 67.4, 18.7. HRMS (ESI) calcd for  $\text{C}_{20}\text{H}_{17}\text{O}_4$  ( $\text{M}+\text{H}$ ) $^+$ : 321.1121, found 321.1118.

**Ethyl 2-ethyl-4-oxo-6-phenyl-4H-pyran-3-carboxylate (3e).** 48 mg, 50% yield,

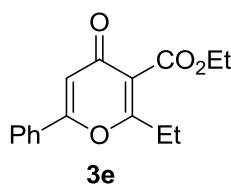

colorless liquid.  $^1\text{H}$  NMR (500 MHz,  $\text{CDCl}_3$ ):  $\delta$  7.79-7.78 (m, 2H), 7.58-7.52 (m, 3H), 6.81 (s, 1H), 4.43 (q,  $J = 7.1$  Hz, 2H), 2.81 (q,  $J = 7.6$  Hz, 2H), 1.41 (t,  $J = 7.3$  Hz, 6H).  $^{13}\text{C}$  NMR (125 MHz,  $\text{CDCl}_3$ ):  $\delta$  175.79, 168.79, 164.26, 162.71, 131.31, 130.46,

128.82, 125.41, 120.81, 110.68, 61.41, 25.73, 13.84, 11.38. HRMS (ESI) calcd for  $\text{C}_{16}\text{H}_{17}\text{O}_4$  ( $\text{M}+\text{H}$ ) $^+$ : 273.1121, found 273.1125.

**Ethyl 4-oxo-2,6-diphenyl-4H-pyran-3-carboxylate (3f).** 78 mg, 70% yield,

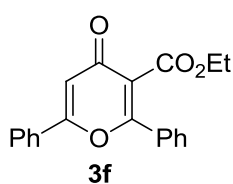

colorless liquid.  $^1\text{H}$  NMR (500 MHz,  $\text{CDCl}_3$ ):  $\delta$  7.81 (d,  $J$  = 6.5 Hz, 2H), 7.73 (d,  $J$  = 7.5 Hz, 2H), 7.50-7.58 (m, 6H), 6.93 (s, 1H), 4.28 (q,  $J$  = 7.0 Hz, 2H), 1.17 (t,  $J$  = 7.0 Hz, 3H).  $^{13}\text{C}$  NMR (75 MHz,  $\text{CDCl}_3$ ):  $\delta$  176.0, 164.3, 163.0, 161.9, 131.4, 131.2, 131.0, 130.3, 128.8, 128.5, 127.5, 125.5, 121.4, 110.5, 61.5, 13.4. HRMS (ESI) calcd for  $\text{C}_{20}\text{H}_{17}\text{O}_4$  ( $\text{M}+\text{H}$ ) $^+$ : 321.1121, found 321.1117.

**Methyl 4-oxo-2,6-diphenyl-4H-pyran-3-carboxylate (3g).** 84 mg, 78% yield, white

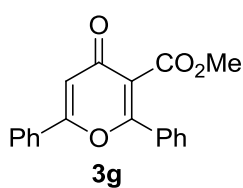

solid, mp: 153-154  $^\circ\text{C}$ .  $^1\text{H}$  NMR (300 MHz,  $\text{CDCl}_3$ ):  $\delta$  7.81 (d,  $J$  = 6.6 Hz, 2H), 7.71 (d,  $J$  = 6.9 Hz, 2H), 7.52-7.57 (m, 6H), 6.90 (s, 1H), 3.80 (s, 3H).  $^{13}\text{C}$  NMR (75 MHz,  $\text{CDCl}_3$ ):  $\delta$  176.3, 165.2, 163.4, 162.4, 131.7, 131.6, 131.4, 130.7, 129.1, 128.9, 127.7, 125.9, 121.5, 110.9, 52.7. HRMS (ESI) calcd for  $\text{C}_{19}\text{H}_{15}\text{O}_4$  ( $\text{M}+\text{H}$ ) $^+$ : 307.0965, found 307.0962.

**Methyl 2-(4-chlorophenyl)-4-oxo-6-phenyl-4H-pyran-3-carboxylate (3h).** 73 mg,

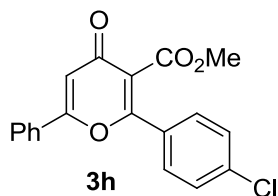

61% yield, white solid, mp: 128-129  $^\circ\text{C}$ .  $^1\text{H}$  NMR (300 MHz,  $\text{CDCl}_3$ ):  $\delta$  7.79 (d,  $J$  = 6.6 Hz, 2H), 7.65 (d,  $J$  = 8.4 Hz, 2H), 7.49-7.54 (m, 5H), 6.89 (s, 1H), 3.82 (s, 3H).  $^{13}\text{C}$  NMR (75 MHz,  $\text{CDCl}_3$ ):  $\delta$  176.1, 165.1, 163.5, 161.2, 138.0, 131.8, 130.6, 129.8, 129.3, 129.2, 129.1, 125.9, 121.7, 111.0, 52.9. HRMS (ESI) calcd for  $\text{C}_{19}\text{H}_{14}\text{ClO}_4$  ( $\text{M}+\text{H}$ ) $^+$ : 341.0575, found 341.0578.

**Methyl 4-oxo-6-phenyl-2-(p-tolyl)-4H-pyran-3-carboxylate (3i).** 93 mg, 83% yield,

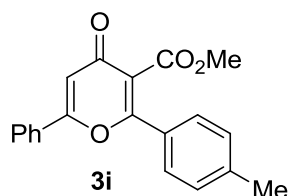

white solid, mp: 137-138  $^\circ\text{C}$ .  $^1\text{H}$  NMR (300 MHz,  $\text{CDCl}_3$ ):  $\delta$  7.81 (d,  $J$  = 6.9 Hz, 2H), 7.61 (d,  $J$  = 8.1 Hz, 2H), 7.50-7.53 (m, 3H), 7.32 (d,  $J$  = 7.8 Hz, 2H), 6.89 (s, 1H), 3.81 (s, 3H), 2.44 (s, 3H).  $^{13}\text{C}$  NMR (75 MHz,  $\text{CDCl}_3$ ):  $\delta$  176.4, 165.5, 163.3, 162.6, 142.2, 131.7, 130.8, 129.7, 129.1, 128.5, 127.7, 125.9, 121.0, 110.8, 52.8, 21.5. HRMS (ESI) calcd for  $\text{C}_{20}\text{H}_{17}\text{O}_4$  ( $\text{M}+\text{H}$ ) $^+$ : 321.1121, found 321.1121.

**3-Acetyl-2-methyl-6-phenyl-4H-pyran-4-one (3j).** 29 mg, 36% yield, white solid, mp: 140-141  $^\circ\text{C}$ .  $^1\text{H}$  NMR (500 MHz,  $\text{CDCl}_3$ ):  $\delta$  7.76 (d,  $J$  = 7.3 Hz, 2H), 7.56-7.46

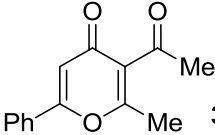
**3j** (m, 3H), 6.78 (s, 1H), 2.61 (s, 3H), 2.50 (s, 3H). <sup>13</sup>C NMR (125MHz, CDCl<sub>3</sub>): δ 200.25, 177.49, 167.22, 162.71, 131.60, 130.57, 129.08, 126.93, 125.77, 111.80, 31.93, 18.87. HRMS (ESI) calcd for C<sub>14</sub>H<sub>13</sub>O<sub>3</sub> (M+H)<sup>+</sup>: 229.0859, found 229.0864.

**3-Benzoyl-2,6-diphenyl-4H-pyran-4-one (3k).** 38 mg, 31% yield, white solid, mp:

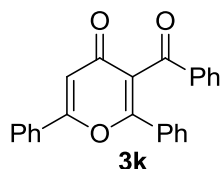

183-184 °C. <sup>1</sup>H NMR (500 MHz, CDCl<sub>3</sub>): δ 7.93 (d, *J* = 7.7 Hz, 2H), 7.87 (d, *J* = 6.8 Hz, 2H), 7.63 (d, *J* = 7.5 Hz, 2H), 7.57-7.52 (m, 4H), 7.44-7.40 (m, 3H), 7.37 (t, *J* = 7.5 Hz, 2H), 6.93 (s, 1H). <sup>13</sup>C NMR (125 MHz, CDCl<sub>3</sub>): δ 193.13, 177.89, 163.59, 161.60, 136.58, 133.80, 131.69, 131.27, 131.18, 130.84, 129.30, 129.16, 128.80, 128.69, 128.19, 126.14, 125.91, 110.98. HRMS (ESI) calcd for C<sub>24</sub>H<sub>17</sub>O<sub>3</sub> (M+H)<sup>+</sup>: 353.1172, found 353.1178.

**Methyl 6-(4-fluorophenyl)-4-oxo-2-phenyl-4H-pyran-3-carboxylate (3l).** 52 mg,

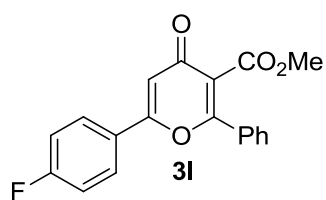

46% yield, white solid, mp: 166-167 °C. <sup>1</sup>H NMR (500 MHz, CDCl<sub>3</sub>): δ 7.80-7.82 (m, 2H), 7.69-7.71 (m, 2H), 7.57 (m, 1H), 7.50-7.53 (m, 2H), 7.20 (t, *J* = 8.5 Hz, 2H), 6.84 (s, 1H), 3.80 (s, 3H). <sup>13</sup>C NMR (125 MHz, CDCl<sub>3</sub>): δ 176.14, 165.12, 164.76 (d, *J* = 252.3 Hz), 162.42, 131.62, 131.26, 128.95, 128.16 (d, *J* = 8.6 Hz), 127.72, 126.93 (d, *J* = 2.1 Hz), 121.48, 116.44 (d, *J* = 22.2 Hz), 110.67, 52.74. HRMS (ESI) calcd for C<sub>19</sub>H<sub>14</sub>FO<sub>4</sub> (M+H)<sup>+</sup>: 325.0871, found 325.0869.

**Methyl 6-(4-chlorophenyl)-4-oxo-2-phenyl-4H-pyran-3-carboxylate (3m).** 73 mg,

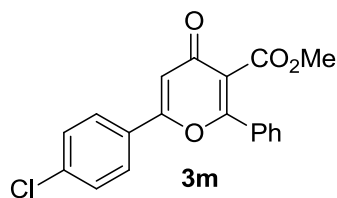

61% yield, white solid, mp: 170-171 °C. <sup>1</sup>H NMR (500 MHz, CDCl<sub>3</sub>): δ 7.74 (d, *J* = 8.5 Hz, 2H), 7.69 (d, *J* = 7.5 Hz, 2H), 7.57 (t, *J* = 7.0 Hz, 1H), 7.48-7.54 (m, 4H), 6.86 (s, 1H), 3.79 (s, 3H). <sup>13</sup>C NMR (125 MHz, CDCl<sub>3</sub>): δ 176.06, 165.05, 162.42, 162.24, 138.03, 131.65, 131.18, 129.48, 129.15, 128.95, 127.70, 127.16, 121.56, 111.00, 52.74. HRMS (ESI) calcd for C<sub>19</sub>H<sub>14</sub>ClO<sub>4</sub> (M+H)<sup>+</sup>: 341.0575, found 341.0570.

**Methyl 6-(4-bromophenyl)-4-oxo-2-phenyl-4H-pyran-3-carboxylate (3n).** 58 mg, 43% yield, white solid, mp: 191-192 °C. <sup>1</sup>H NMR (500 MHz, CDCl<sub>3</sub>): δ 7.70-7.68 (m,

2H), 7.66-7.64 (m, 4H), 7.58 (t,  $J = 6.8$  Hz, 1H), 7.53-7.51 (m, 2H), 6.88 (s, 1H), 3.79 (s, 3H).  $^{13}\text{C}$  NMR (125 MHz,  $\text{CDCl}_3$ ):  $\delta$  176.10, 165.06, 162.49, 162.36, 132.50, 131.68, 131.22, 129.66, 128.99, 127.75, 127.34, 126.48, 121.64, 111.08, 52.79. HRMS (ESI) calcd for  $\text{C}_{19}\text{H}_{14}\text{BrO}_4$  ( $\text{M}+\text{H}$ ) $^+$ : 385.0070, found 385.0076.

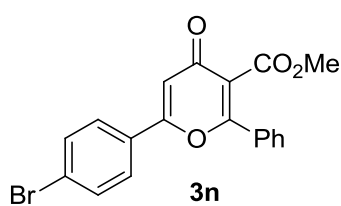

**Methyl 4-oxo-2-phenyl-6-(p-tolyl)-4H-pyran-3-carboxylate (3o).** 74 mg, 66% yield, white solid, mp: 149-150 °C.  $^1\text{H}$  NMR (500 MHz,  $\text{CDCl}_3$ ):  $\delta$  6.89-7.72 (m, 4H), 7.50-7.57 (m, 3H), 7.30 (d,  $J = 7.5$  Hz, 2H), 6.85 (s, 1H), 3.79 (s, 3H), 2.43 (s, 3H).  $^{13}\text{C}$  NMR (125 MHz,  $\text{CDCl}_3$ ):  $\delta$  176.35, 165.31, 163.57, 162.24, 142.41, 131.50, 131.43, 129.85, 128.89, 127.87, 127.72, 125.83, 121.39, 110.20, 52.69, 21.43. HRMS (ESI) calcd for  $\text{C}_{20}\text{H}_{17}\text{O}_4$  ( $\text{M}+\text{H}$ ) $^+$ : 321.1121, found 321.1118.

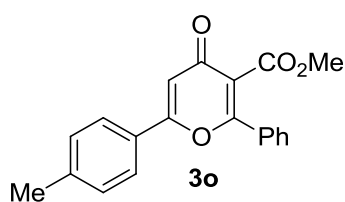

**Methyl 6-(3-chlorophenyl)-4-oxo-2-phenyl-4H-pyran-3-carboxylate (3p).** 68 mg, 57% yield, white solid, mp: 96-97 °C.  $^1\text{H}$  NMR (500 MHz,  $\text{CDCl}_3$ ):  $\delta$  7.78 (s, 1H), 7.71-7.67 (m, 3H), 7.58 (t,  $J = 7.3$  Hz, 1H), 7.55-7.50 (m, 3H), 7.45 (t,  $J = 7.9$  Hz, 1H), 6.88 (s, 1H), 3.80 (s, 3H).  $^{13}\text{C}$  NMR (125 MHz,  $\text{CDCl}_3$ ):  $\delta$  176.02, 165.01, 162.58, 161.87, 135.41, 132.51, 131.70, 131.14, 130.47, 129.00, 127.75, 125.96, 124.05, 121.71, 111.59, 52.78. HRMS (ESI) calcd for  $\text{C}_{19}\text{H}_{14}\text{ClO}_4$  ( $\text{M}+\text{H}$ ) $^+$ : 341.0575, found 341.0579.

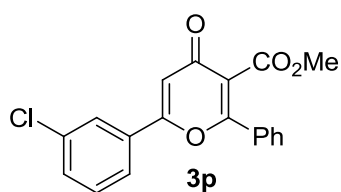

**Methyl 4-oxo-2-phenyl-6-(m-tolyl)-4H-pyran-3-carboxylate (3q).** 49 mg, 44% yield, white solid, mp: 132-133 °C.  $^1\text{H}$  NMR (500 MHz,  $\text{CDCl}_3$ ):  $\delta$  7.71 (d,  $J = 7.2$  Hz, 2H), 7.62-7.58 (m, 2H), 7.58-7.49 (m, 3H), 7.39 (t,  $J = 7.6$  Hz, 1H), 7.35 (d,  $J = 7.5$  Hz, 1H), 6.88 (s, 1H), 3.80 (s, 3H), 2.43 (s, 3H).  $^{13}\text{C}$  NMR (125 MHz,  $\text{CDCl}_3$ ):  $\delta$  176.31, 165.26, 163.61, 162.37, 138.98, 132.52, 131.51, 131.39, 130.65, 129.02, 128.90, 127.73, 126.41, 123.12, 121.48, 110.83, 52.69, 21.40. HRMS (ESI) calcd for  $\text{C}_{20}\text{H}_{17}\text{O}_4$  ( $\text{M}+\text{H}$ ) $^+$ : 321.1121, found 321.1124.

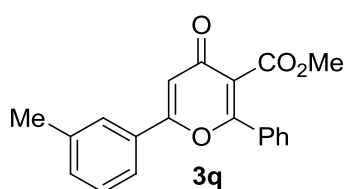

**Methyl 6-(2-chlorophenyl)-4-oxo-2-phenyl-4H-pyran-3-carboxylate (3r).** 50 mg,

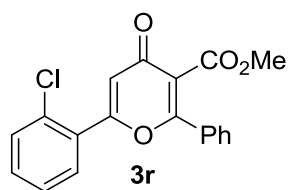

42% yield, white solid, mp: 153-154 °C. <sup>1</sup>H NMR (500 MHz, CDCl<sub>3</sub>): δ 7.70 (d, *J* = 7.5 Hz, 2H), 7.56-7.51 (m, 3H), 7.50-7.44 (m, 3H), 7.40 (t, *J* = 7.5 Hz, 1H), 6.74 (s, 1H), 3.81 (s, 3H). <sup>13</sup>C NMR (125 MHz, CDCl<sub>3</sub>): δ 175.96, 165.19, 163.00,

162.58, 132.74, 132.05, 131.60, 131.09, 130.81, 130.58, 128.82, 127.76, 127.22, 121.43, 116.48, 52.76. HRMS (ESI) calcd for C<sub>19</sub>H<sub>14</sub>ClO<sub>4</sub> (M+H)<sup>+</sup>: 341.0575, found 341.0575.

**Methyl 6-(naphthalen-1-yl)-4-oxo-2-phenyl-4H-pyran-3-carboxylate (3s).** 34 mg,

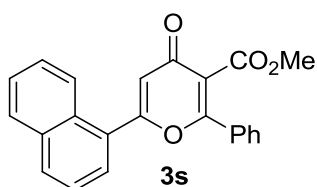

27% yield, white solid, mp: 153-154 °C. <sup>1</sup>H NMR (500 MHz, CDCl<sub>3</sub>): δ 8.10-8.09 (m, 1H), 8.03 (d, *J* = 8.2 Hz, 1H), 7.96-7.94 (m, 1H), 7.72-7.68 (m, 3H), 7.60-7.56 (m, 3H), 7.52 (t, *J* = 7.3 Hz, 1H), 7.46 (t, *J* = 7.4 Hz, 2H), 6.79

(s, 1H), 3.85 (s, 3H). <sup>13</sup>C NMR (125 MHz, CDCl<sub>3</sub>): δ 176.12, 165.34, 164.96, 162.89, 133.64, 131.66, 131.56, 131.09, 130.14, 129.37, 128.81, 128.73, 127.85, 127.67, 127.55, 126.60, 124.95, 124.32, 121.48, 116.46, 52.77. HRMS (ESI) calcd for C<sub>23</sub>H<sub>17</sub>O<sub>4</sub> (M+H)<sup>+</sup>: 357.1121, found 357.1120.

**Methyl 6-(furan-2-yl)-4-oxo-2-phenyl-4H-pyran-3-carboxylate (3t).** 19 mg, 18%

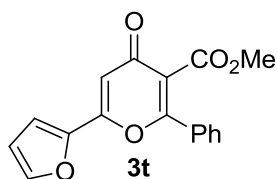

yield, colorless liquid. <sup>1</sup>H NMR (500 MHz, CDCl<sub>3</sub>): δ 7.69-7.65 (m, 2H), 7.61 (d, *J* = 1.0 Hz, 1H), 7.57-7.53 (m, 1H), 7.50 (t, *J* = 7.4 Hz, 2H), 7.01 (d, *J* = 3.5 Hz, 1H), 6.77 (s, 1H), 6.58 (dd, *J* = 3.5, 1.7 Hz, 1H), 3.78 (s, 3H). <sup>13</sup>C NMR (75

MHz, CDCl<sub>3</sub>): δ 175.78, 165.16, 161.79, 155.31, 145.91, 145.42, 131.62, 131.20, 128.92, 127.74, 121.63, 112.87, 112.45, 108.64, 52.80. HRMS (ESI) calcd for C<sub>17</sub>H<sub>13</sub>O<sub>5</sub> (M+H)<sup>+</sup>: 297.0757, found 297.0761.

**Methyl 4-cyclopropyl-2-oxo-6-phenyl-2H-pyran-5-carboxylate (3u).** 41 mg, 43%

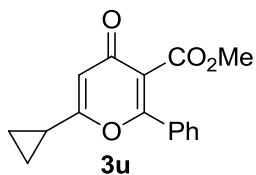

yield, colorless liquid. <sup>1</sup>H NMR (500 MHz, CDCl<sub>3</sub>): δ 7.53 (d, *J* = 8.0 Hz, 2H), 7.49 (d, *J* = 7.1 Hz, 1H), 7.44 (t, *J* = 7.5 Hz, 2H), 6.27 (s, 1H), 3.74 (s, 3H), 1.90-1.82 (m, 1H), 1.11-1.04 (m, 4H).

$^{13}\text{C}$  NMR (125 MHz,  $\text{CDCl}_3$ ):  $\delta$  175.73, 169.61, 165.32, 161.72, 131.34, 131.22, 128.77, 127.41, 121.19, 111.09, 52.59, 13.83, 8.33. HRMS (ESI) calcd for  $\text{C}_{16}\text{H}_{15}\text{O}_4$  ( $\text{M}+\text{H}$ ) $^+$ : 271.0965, found 271.0965.

**Methyl 4-oxo-6-pentyl-2-phenyl-4H-pyran-3-carboxylate (3v).** 19 mg, 18% yield,

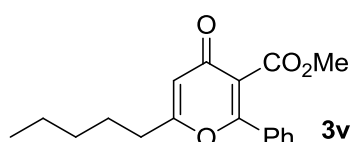

colorless liquid.  $^1\text{H}$  NMR (500 MHz,  $\text{CDCl}_3$ ):  $\delta$  7.60 (d,  $J = 7.5$  Hz, 2H), 7.52 (t,  $J = 7.5$  Hz, 1H), 7.47 (t,  $J = 7.5$  Hz, 2H), 6.26 (s, 1H), 3.77 (s, 3H), 2.59 (t,  $J = 7.5$  Hz,

2H), 1.74-1.68 (m, 2H), 1.39-1.36 (m, 4H), 0.92 (t,  $J = 7.0$  Hz, 3H).  $^{13}\text{C}$  NMR (125 MHz,  $\text{CDCl}_3$ ):  $\delta$  176.34, 169.26, 165.41, 162.57, 131.42, 131.38, 128.80, 127.63, 121.14, 113.37, 52.72, 33.52, 30.96, 26.28, 22.22, 13.79. HRMS (ESI) calcd for  $\text{C}_{18}\text{H}_{21}\text{O}_4$  ( $\text{M}+\text{H}$ ) $^+$ : 301.1434, found 301.1438.

**Methyl 6-methyl-4-oxo-2-phenyl-4H-pyran-3-carboxylate (3w).** 34 mg, 40% yield,

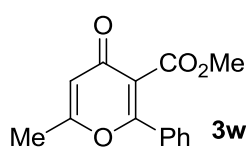

colorless liquid.  $^1\text{H}$  NMR (300 MHz,  $\text{CDCl}_3$ ):  $\delta$  7.62-7.59 (m, 2H), 7.75-7.43 (m, 3H), 6.26 (s, 1H), 3.76 (s, 3H), 2.35 (s, 3H).

$^{13}\text{C}$  NMR (125 MHz,  $\text{CDCl}_3$ ):  $\delta$  176.21, 165.62, 165.35, 162.71, 131.44, 131.28, 128.78, 127.66, 121.11, 114.13, 52.69, 19.82. HRMS (ESI) calcd for  $\text{C}_{14}\text{H}_{13}\text{O}_4$  ( $\text{M}+\text{H}$ ) $^+$ : 245.0808, found 245.0815.

**Methyl 4-methyl-2-oxo-6-phenyl-2H-pyran-5-carboxylate (4a).** 20 mg, 23% yield,

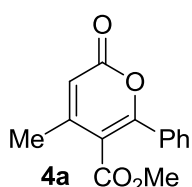

white solid, mp: 99-100  $^{\circ}\text{C}$ .  $^1\text{H}$  NMR (500 MHz,  $\text{CDCl}_3$ ):  $\delta$  7.57 (d,  $J = 7.4$  Hz, 2H), 7.52-7.41 (m, 3H), 6.16 (s, 1H), 3.66 (s, 3H), 2.25 (s, 3H).  $^{13}\text{C}$  NMR (125 MHz,  $\text{CDCl}_3$ ):  $\delta$  166.60, 161.04, 160.32, 153.69,

131.88, 128.52, 127.80, 113.26, 112.44, 52.46, 20.16. HRMS (ESI) calcd for  $\text{C}_{14}\text{H}_{13}\text{O}_4$  ( $\text{M}+\text{H}$ ) $^+$ : 245.0808, found 245.0811.

**Methyl 2-oxo-6-phenyl-2H-pyran-5-carboxylate (4b).** 39 mg, 48% yield, colorless

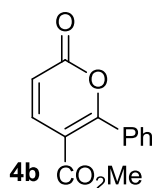

liquid.  $^1\text{H}$  NMR (300 MHz,  $\text{CDCl}_3$ ):  $\delta$  7.86 (d,  $J = 9.7$  Hz, 1H), 7.58-7.43 (m, 5H), 6.34 (d,  $J = 9.7$  Hz, 1H), 3.71 (s, 3H).  $^{13}\text{C}$  NMR

(75MHz,  $\text{CDCl}_3$ ):  $\delta$  167.2, 164.9, 160.1, 144.1, 132.1, 131.2, 129.1, 128.0, 113.2, 109.4, 52.2. HRMS (ESI) calcd for  $\text{C}_{13}\text{H}_{11}\text{O}_4$  ( $\text{M}+\text{H}$ ) $^+$ : 231.0652, found 231.0656.

**4-Oxo-2,6-diphenyl-4H-pyran-3-carbonitrile (5).** 49 mg, 51% yield, white solid,

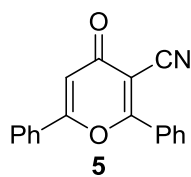

mp: 177-178 °C.  $^1\text{H}$  NMR (500 MHz,  $\text{CDCl}_3$ ):  $\delta$  8.09 (d,  $J = 7.5$  Hz, 2H), 7.82 (d,  $J = 7.0$  Hz, 2H), 7.68 (t,  $J = 7.5$  Hz, 1H), 7.54-7.64 (m, 5H), 6.91 (s, 1H).  $^{13}\text{C}$  NMR (75MHz,  $\text{CDCl}_3$ ):  $\delta$  175.1, 170.3, 163.7, 133.3, 132.4, 129.8, 129.6, 129.4, 129.2, 128.4, 126.0, 113.4, 109.9, 102.0. HRMS (ESI) calcd for  $\text{C}_{18}\text{H}_{12}\text{NO}_2$  ( $\text{M}+\text{H}$ ) $^+$ : 274.0863, found 274.0859.

### Procedure for the synthesis of compound 6 from 3a or 3g.

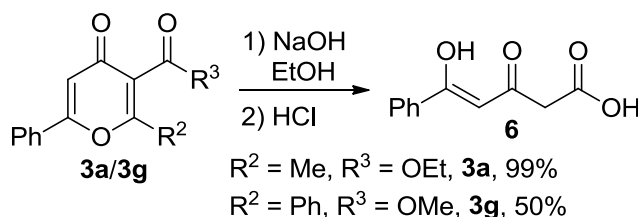

To a 10 mL round-bottom flask was charged with **3a/3g** (0.1 mmol) and 3 mL of EtOH. Then 5 mL of 1M NaOH (aq) was added and the resulting mixture was stirred for a period of time until the completion of the reaction as monitored by TLC. The solution was acidified to pH = 3 with 1M HCl, and was subsequently extracted with DCM. Then, the organic phase was dried over anhydrous  $\text{MgSO}_4$ . The mixture was filtered and the filtrate was concentrated under reduced pressure. The residue was purified by chromatography on silica gel using hexane/EtOAc (1:2) as the eluent to afford product **6**.

**5-Hydroxy-3-oxo-5-phenylpent-4-enoic acid (6).** 20 mg from **3a** and 10 mg from **3g**.

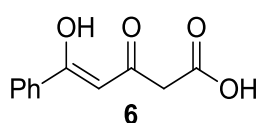

Colorless liquid. Known compound.<sup>[3]</sup>  $^1\text{H}$  NMR (500 MHz,  $\text{CDCl}_3$ ):  $\delta$  15.44 (brs, 1H), 7.89 (d,  $J = 8.0$  Hz, 2H), 7.56 (t,  $J = 7.3$  Hz, 1H), 7.47 (t,  $J = 7.6$  Hz, 2H), 6.28 (s, 1H), 3.57 (s, 2H).

### Procedure for the synthesis of compound 9.

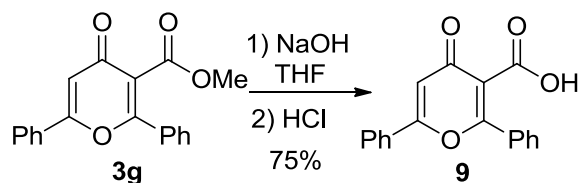

To a 10 mL round-bottom flask was charged with **3g** (31 mg, 0.1 mmol) and 3 mL of THF. Then 5 mL of 1M NaOH (aq) was added and the resulting mixture was stirred

for a period of time until the completion of the reaction as monitored by TLC. The solution was acidified to pH = 3 with 1M HCl, and was subsequently extracted with DCM. Then, the organic phase was dried over anhydrous MgSO<sub>4</sub>. The mixture was filtered and the filtrate was concentrated under reduced pressure. The residue was purified by chromatography on silica gel using hexane/EtOAc (1:2) as the eluent to afford 22 mg of compound **9**.

**4-Oxo-2,6-diphenyl-4H-pyran-3-carboxylic acid (9).** White solid, mp: 202-203 °C.

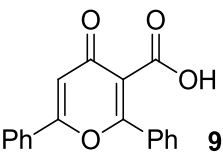 **9** <sup>1</sup>H NMR (300 MHz, CDCl<sub>3</sub>): δ 7.84-7.81 (m, 2H), 7.69-7.66 (m, 2H), 7.61-7.51 (m, 6H), 7.11 (s, 1H). <sup>13</sup>C NMR (125 MHz, CDCl<sub>3</sub>): δ 181.97, 173.18, 165.01, 163.06, 132.83, 131.87, 131.75, 129.45, 129.31, 128.21, 126.33, 113.41, 110.17. HRMS (ESI) calcd for C<sub>18</sub>H<sub>13</sub>O<sub>4</sub> (M+H)<sup>+</sup>: 293.0808, found 293.0815.

**Procedure for the synthesis of compound 10 from 9.**

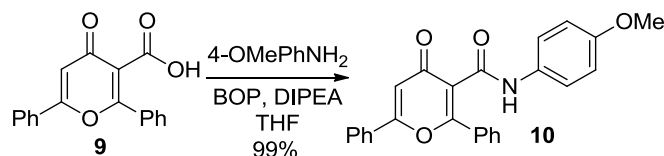

To a 10 mL round-bottom flask was charged with **9** (29 mg, 0.1 mmol), BOP (66 mg, 0.15 mmol), 3 mL of THF and DIPEA (26 mg, 0.2 mmol). After 5 mins, 4-OMePhNH<sub>2</sub> (15 mg, 0.12 mmol) was added to the solution, and the resulting mixture was stirred for a period of time until the completion of the reaction as monitored by TLC. Then, the reaction mixture was concentrated under reduced pressure. The residue was purified by chromatography on silica gel using hexane/EtOAc (3:1) as the eluent to afford 39 mg of compound **10**.

**N-(4-methoxyphenyl)-4-oxo-2,6-diphenyl-4H-pyran-3-carboxamide (10).** White

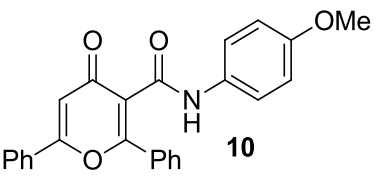 **10** solid, mp: 177-178 °C. <sup>1</sup>H NMR (500 MHz, CDCl<sub>3</sub>): δ 10.94 (brs, 1H), 7.82 (d, *J* = 7.5 Hz, 2H), 7.68 (d, *J* = 7.0 Hz, 2H), 7.49-7.57 (m, 8H), 6.99 (s, 1H), 6.84 (d, *J* = 9.0 Hz, 2H), 3.78 (s, 3H). <sup>13</sup>C NMR (75 MHz, CDCl<sub>3</sub>): δ 179.47, 169.65, 163.09, 160.27, 156.32, 133.18, 131.99, 131.43, 131.05, 130.13, 129.21, 128.77, 128.26, 126.02, 122.03, 118.69, 113.99, 111.24, 55.43. HRMS (ESI) calcd for C<sub>25</sub>H<sub>20</sub>NO<sub>4</sub>

(M+H)<sup>+</sup>: 398.1387, found 398.1395.

#### Procedure for the synthesis of compound 11.

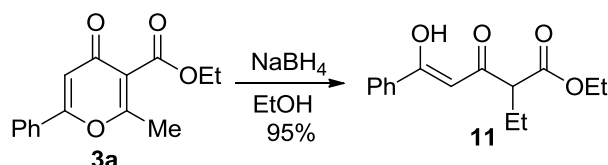

To a 10 mL round-bottom flask was charged with **3a** (26 mg, 0.1 mmol), 10 mg of NaBH<sub>4</sub> (0.25 mmol) and 3 mL of EtOH. The mixture was stirred at room temperature for 4h. The mixture was concentrated and the residue was purified by chromatography on silica gel using hexane/EtOAc (1:1) as the eluent to afford 25 mg of compound **11**.

**Ethyl 2-ethyl-5-hydroxy-3-oxo-5-phenylpent-4-enoate (11)**. Colorless liquid. <sup>1</sup>H

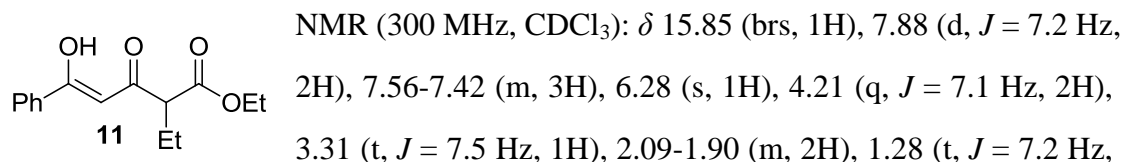

#### Procedure for the synthesis of product 3g from acid chloride.

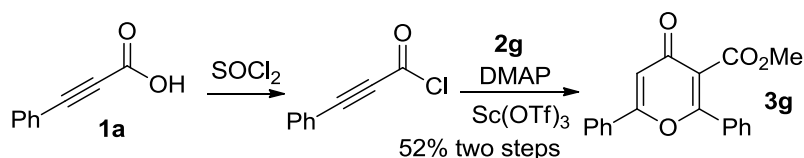

To an oven-dried 25 mL round-bottom flask was charged with acid **1a** (51 mg, 0.35 mmol) and 5 mL of SOCl<sub>2</sub>. The resulting mixture was refluxed for 2h, and then SOCl<sub>2</sub> was removed under reduced pressure. Then, substrate **2g** (125 mg, 0.7 mmol), DMAP (85 mg, 0.7 mmol), and Sc(OTf)<sub>3</sub> (30 mg, 0.06 mmol) was added to the residue followed by addition of anhydrous 1,2-DCE (4 mL). The resulting mixture was heated at 80°C in air for a period time until the completion of the reaction as monitored by TLC. The mixture was cooled to room temperature. The mixture was filtered and the filtrate was concentrated under reduced pressure. The residue was purified by chromatography on silica gel using hexane/EtOAc (10:1) as the eluent to afford 56

mg of product **3g** (52%).

**Procedure for the reaction of alkynyl acyl imidazole **12** with **2g**.**

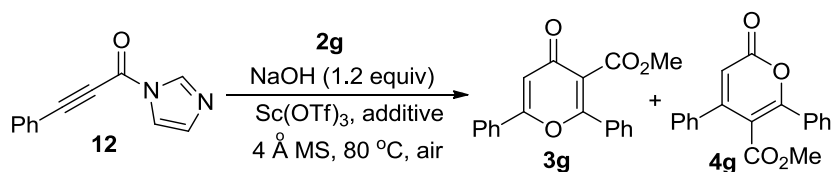

To an oven-dried 10 mL round-bottom flask was charged with **12** (39 mg, 0.2 mmol) **2g** (71 mg, 0.4 mmol), additive (none or certain amount of DMAP), Sc(OTf)<sub>3</sub> (17 mg, 0.034 mmol), 200 mg of 4 Å MS and NaOH (10 mg, 0.24 mmol). Then anhydrous 1,2-DCE (3 mL) was added to the flask and the resulting mixture was heated at 80 °C in air for a period time until the completion of the reaction as monitored by TLC. The mixture was cooled to room temperature. The mixture was concentrated under reduced pressure. The residue was purified by chromatography on silica gel using hexane/EtOAc (10:1) as the eluent to afford products **3g** and/or **4g**. 6 mg of **3g** and 31 mg of **4g** were obtained when none of additive was added. 32 mg of **3g** and 5 mg of **4g** were obtained when 20 mol % of DMAP was added. 40 mg of **3g** was obtained when 1.1 equiv of DMAP was added.

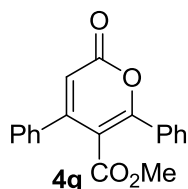

**Methyl 2-oxo-4,6-diphenyl-2H-pyran-5-carboxylate (4g).**

Colorless liquid. Known compound. <sup>[5]</sup> <sup>1</sup>H NMR (300 MHz, CDCl<sub>3</sub>):  $\delta$  7.64 (d,  $J$  = 6.6 Hz, 2H), 7.50-7.43 (m, 6H), 7.37-7.35 (m, 2H), 6.29 (s, 1H), 3.46 (s, 3H).

**References:**

- [1] a) J. Lim, J. Choi, H.-S. Kim, I. S. Kim, K. C. Nam, J. Kim, S. Lee, *J. Org. Chem.* **2016**, *81*, 303; b) D. R. Stuart, P. Alsabeh, M. Kuhn, K. Fagnou, *J. Am. Chem. Soc.* **2010**, *132*, 18326.
- [2] R. Balamurugan, S. Manojveer, *Chem. Commun.* **2011**, *47*, 11143.
- [3] N. Latif, E. T. Kaiser, *J. Org. Chem.* **1969**, *34*, 3653.
- [4] D. Schmidt, J. Conrad, I. Klaiber, U. Beifuss, *Chem. Commun.* **2006**, 4732.
- [5] R. Manikandan, M. Jeganmohan *Org. Lett.* **2014**, *16*, 652.

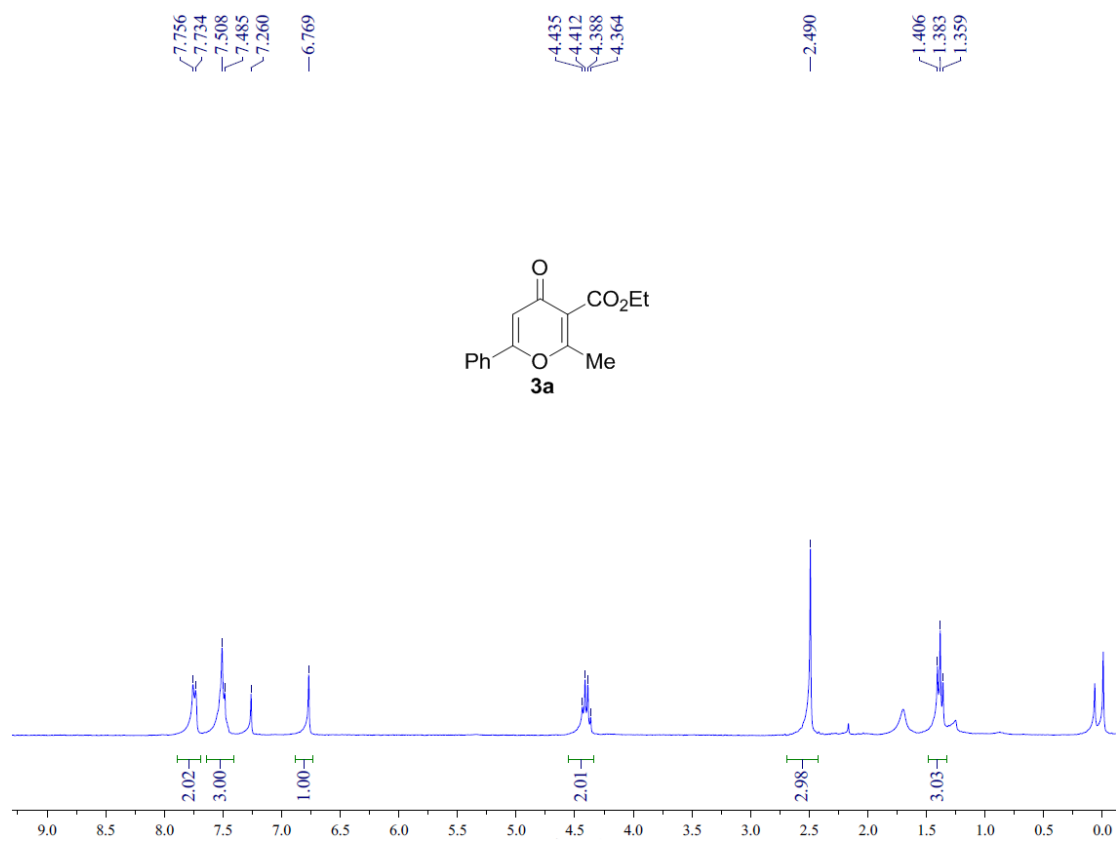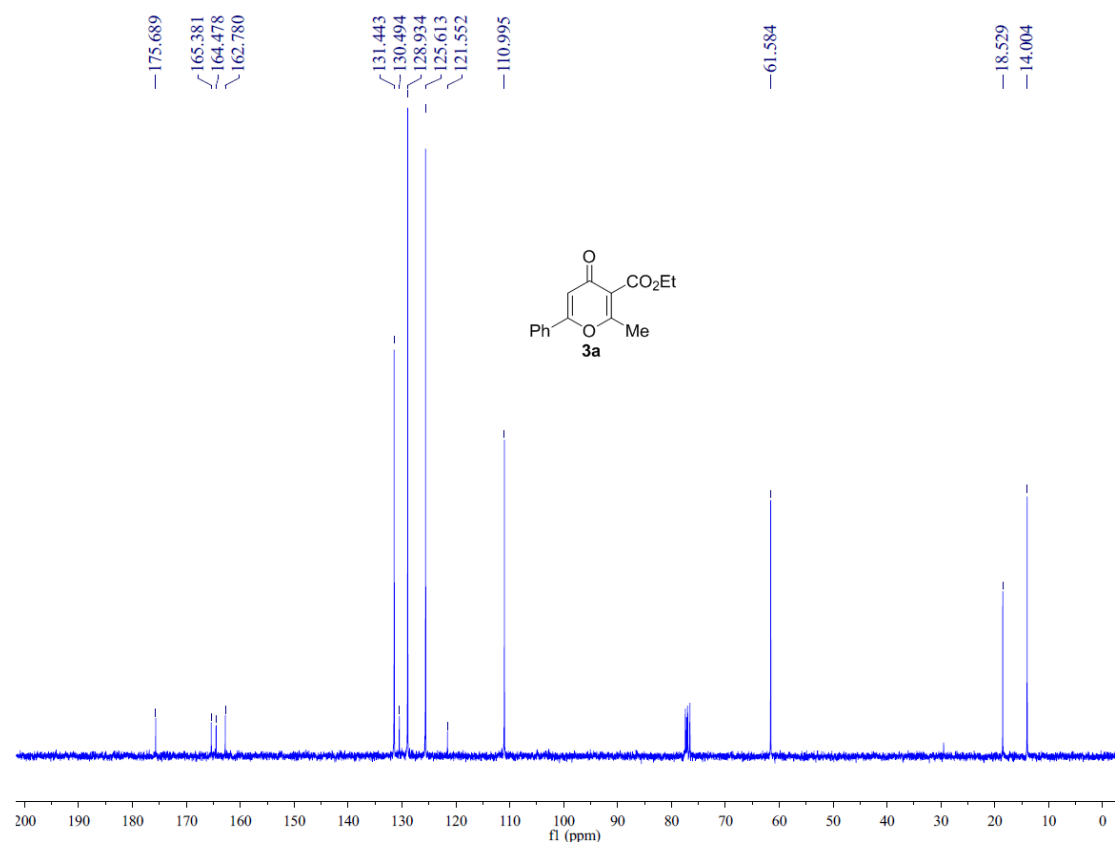

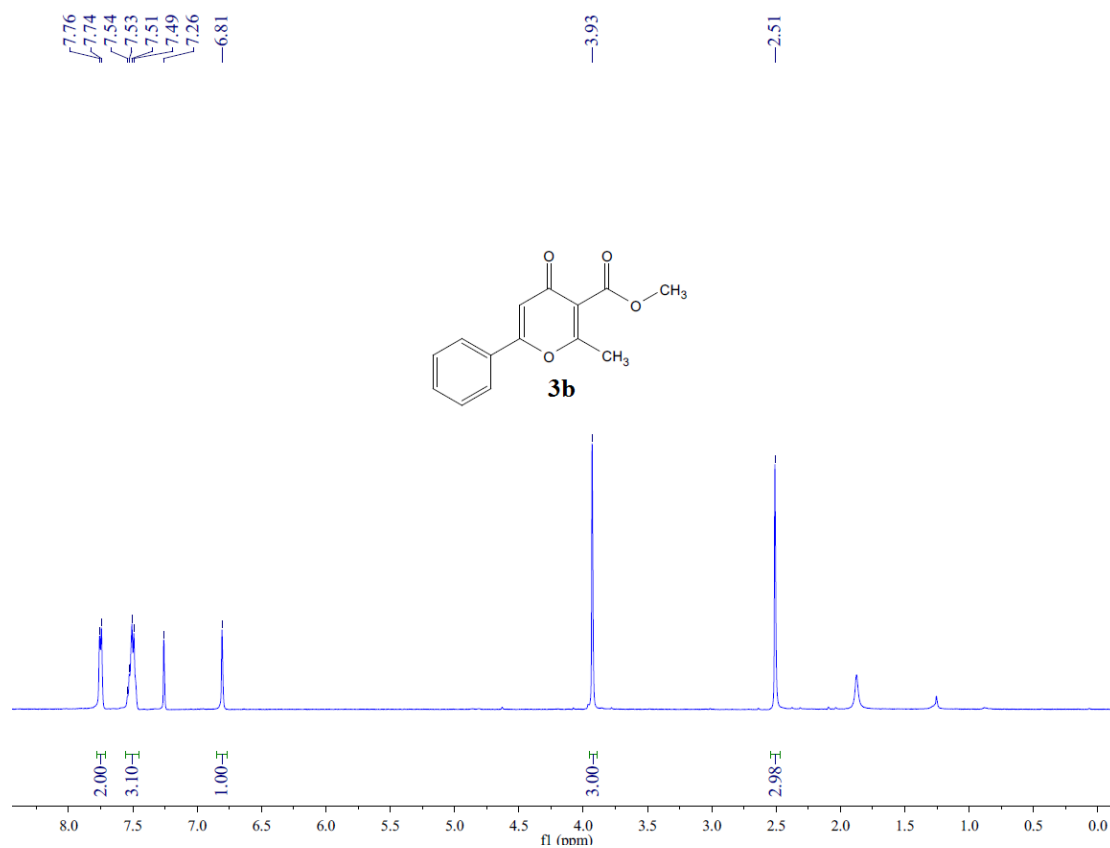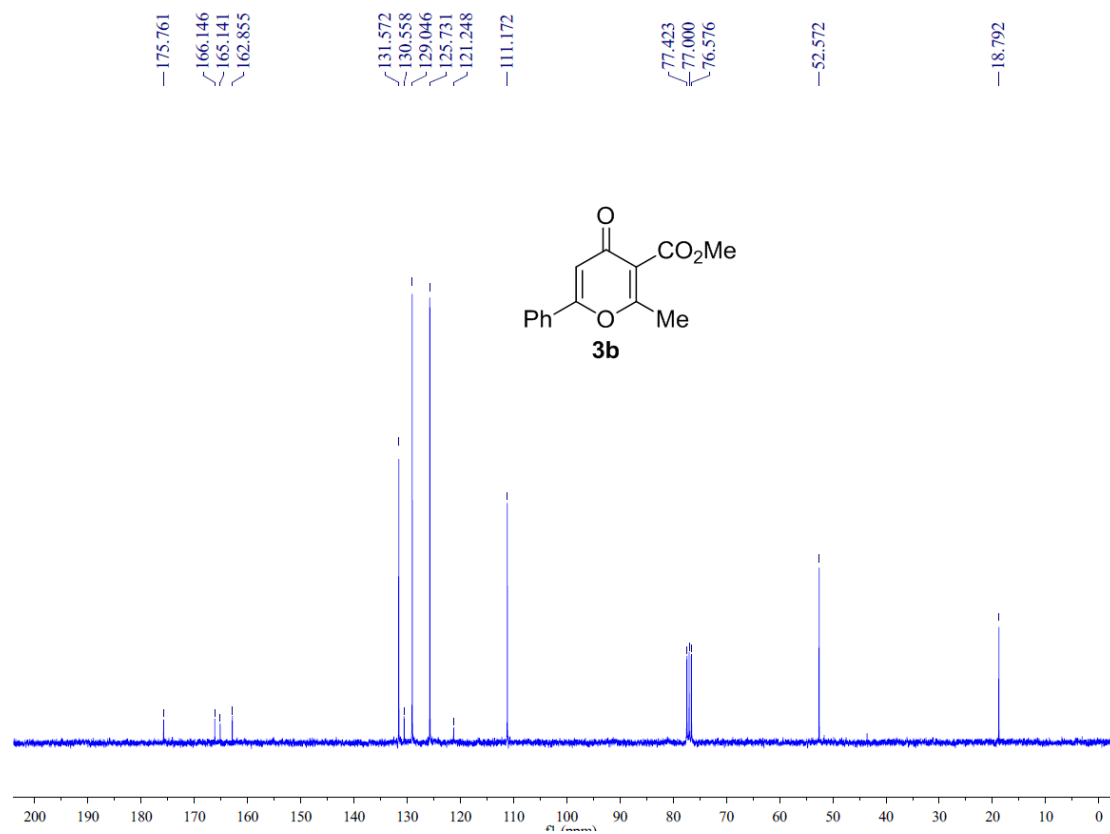

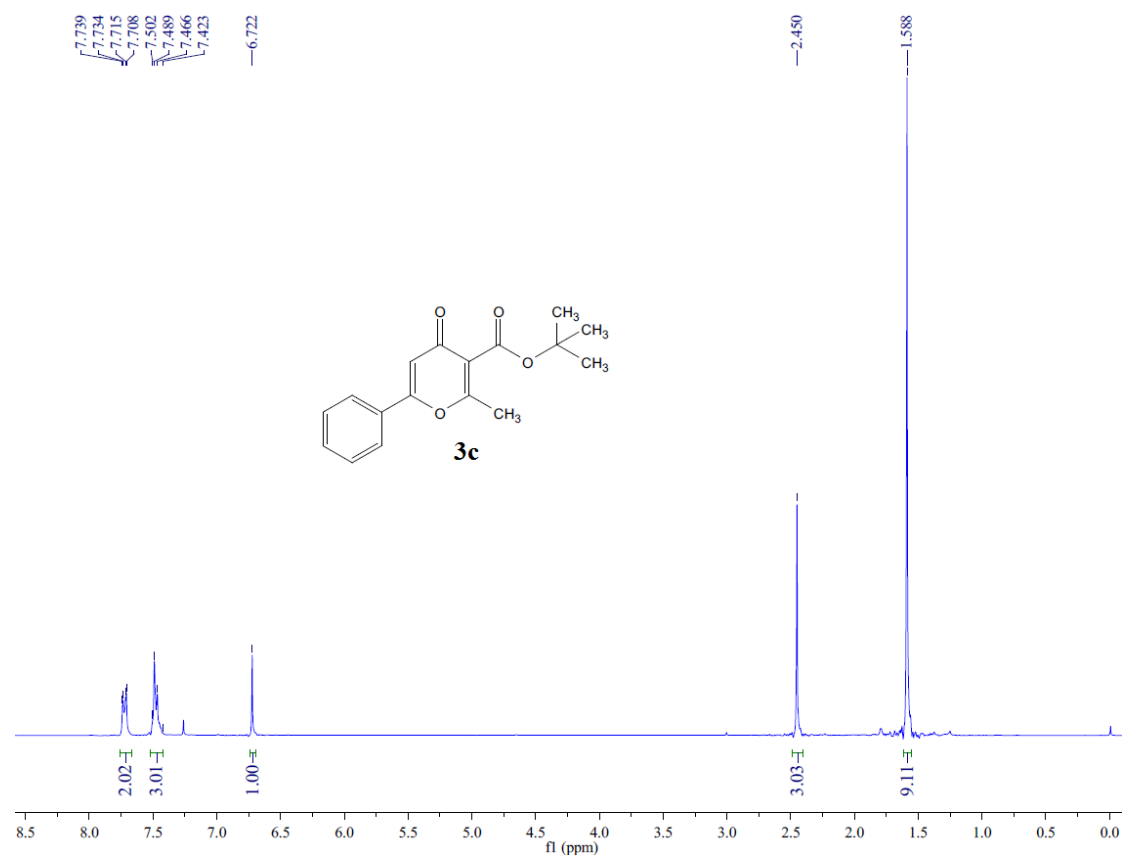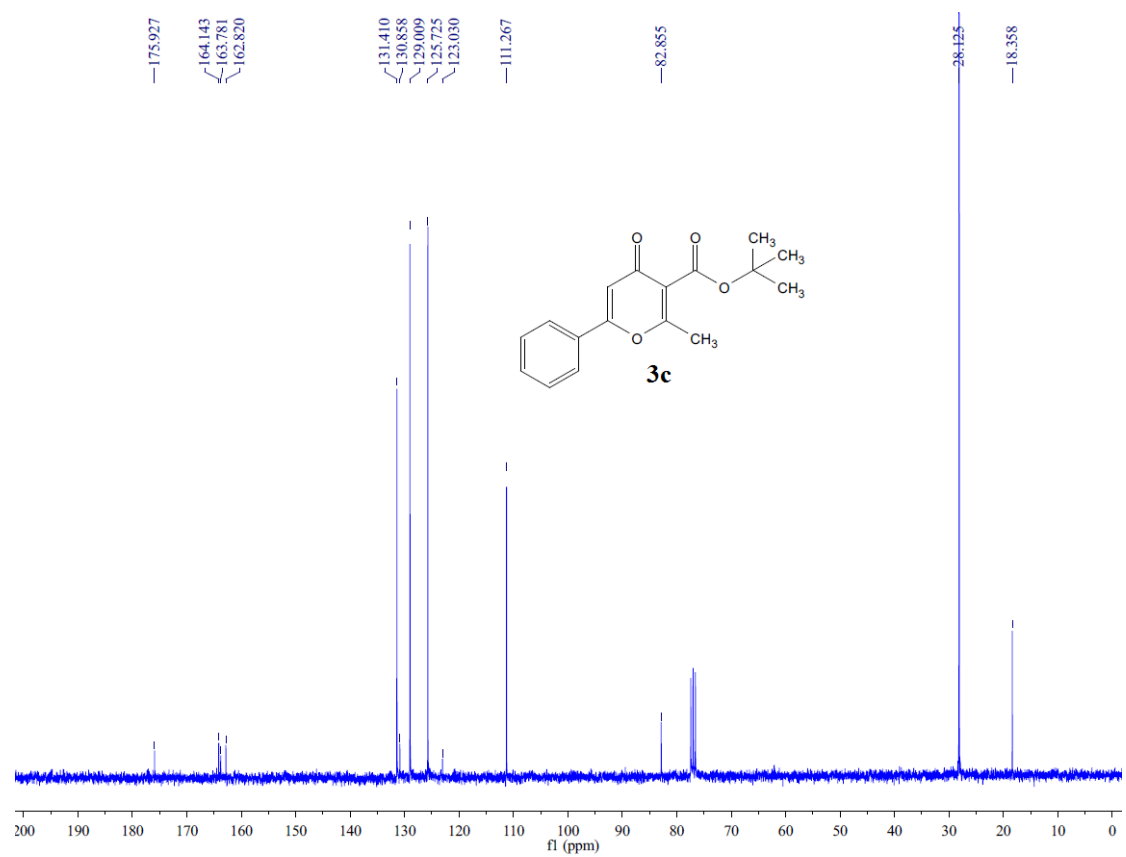

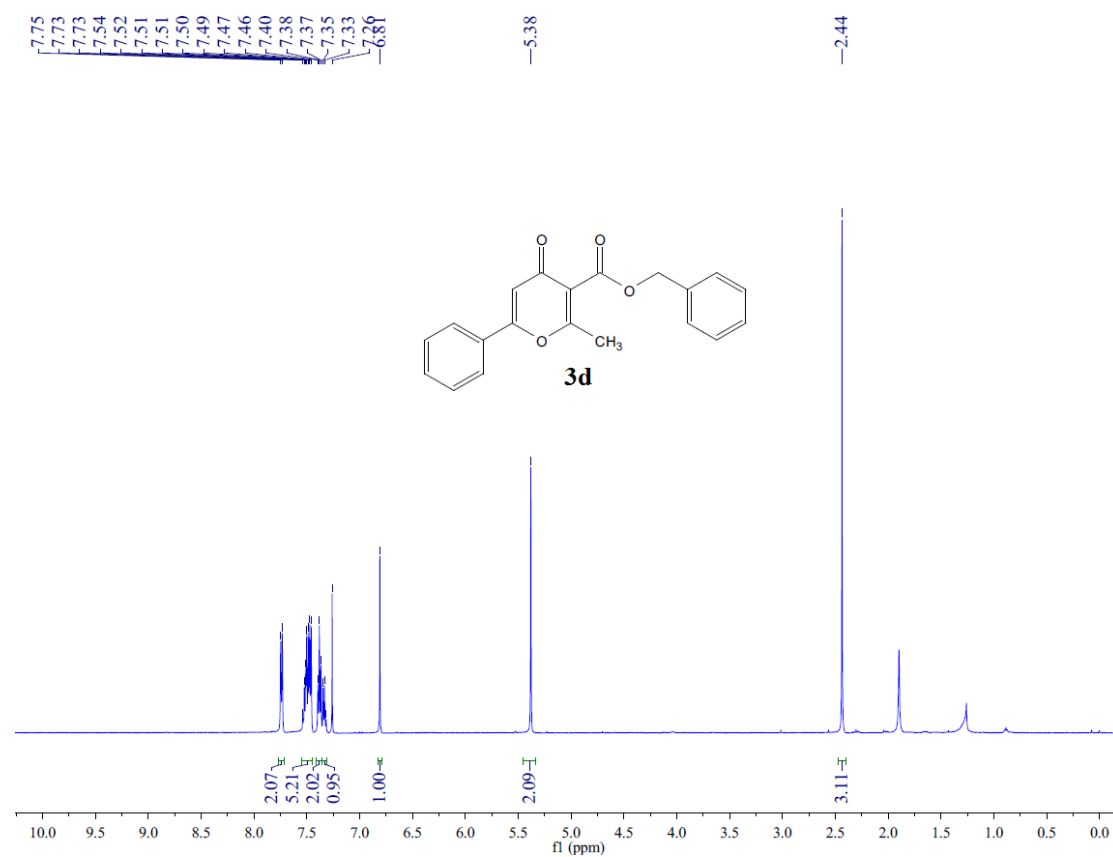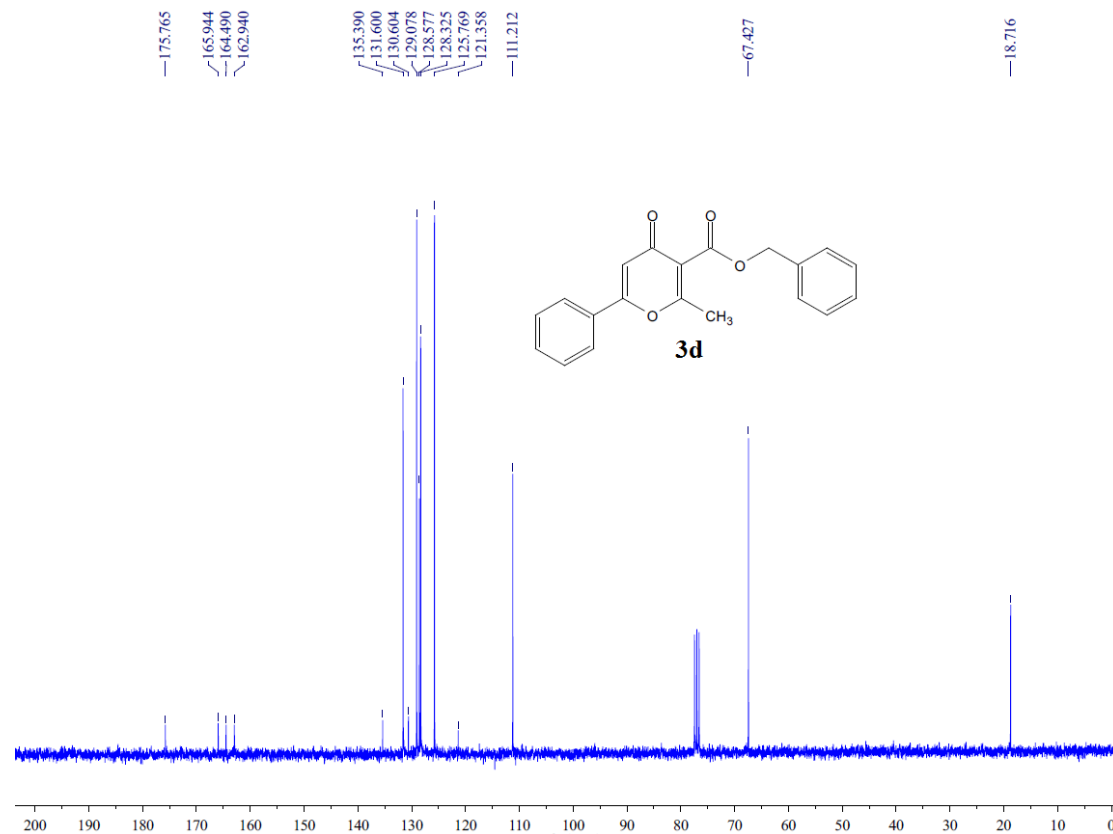

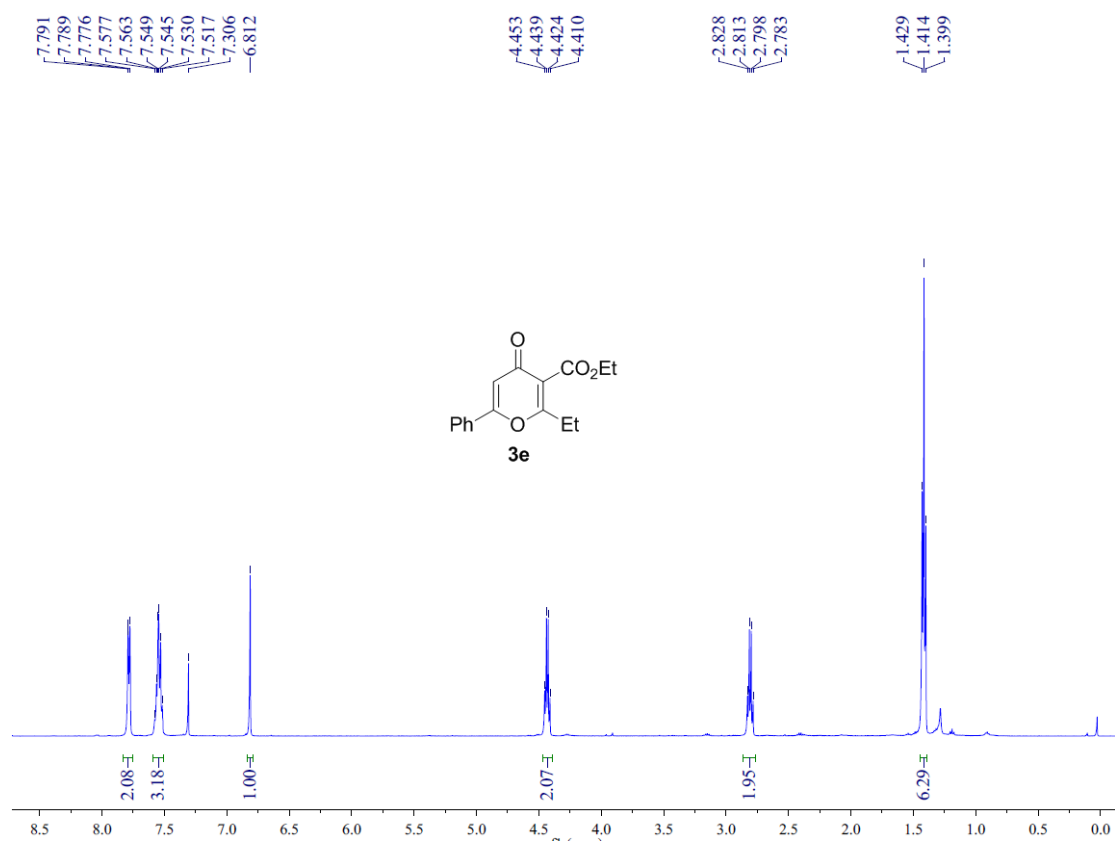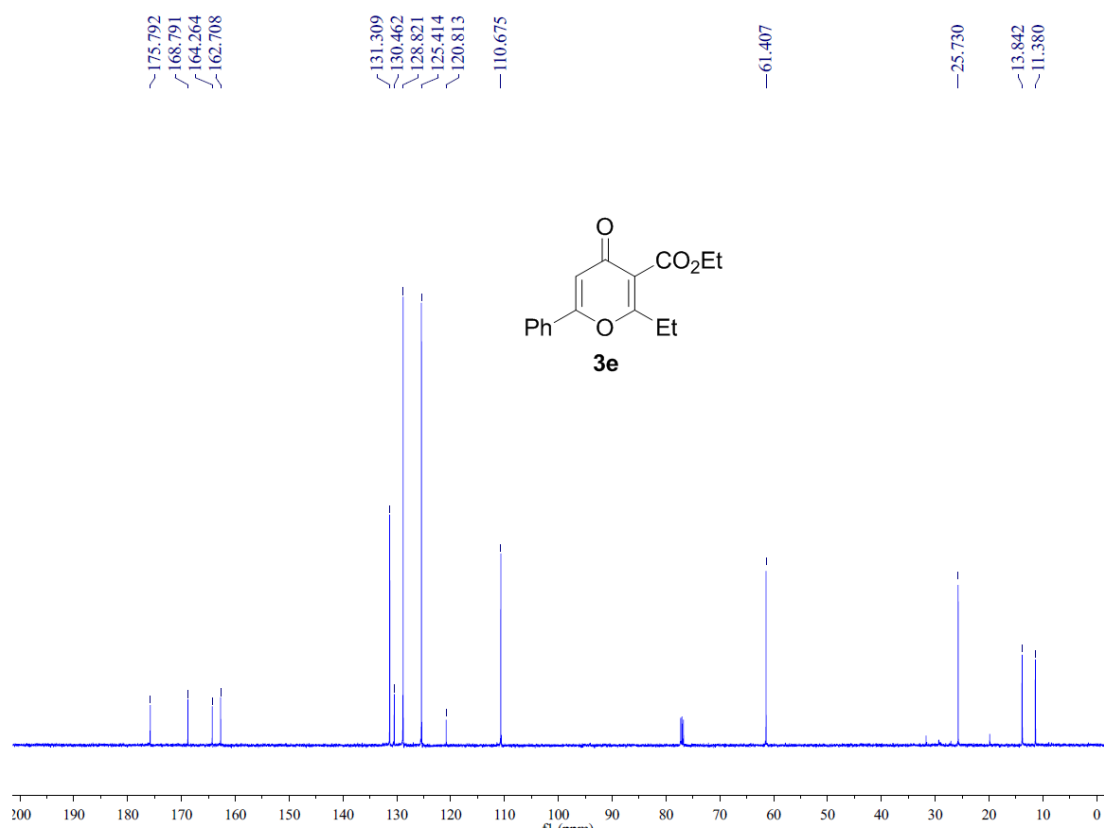

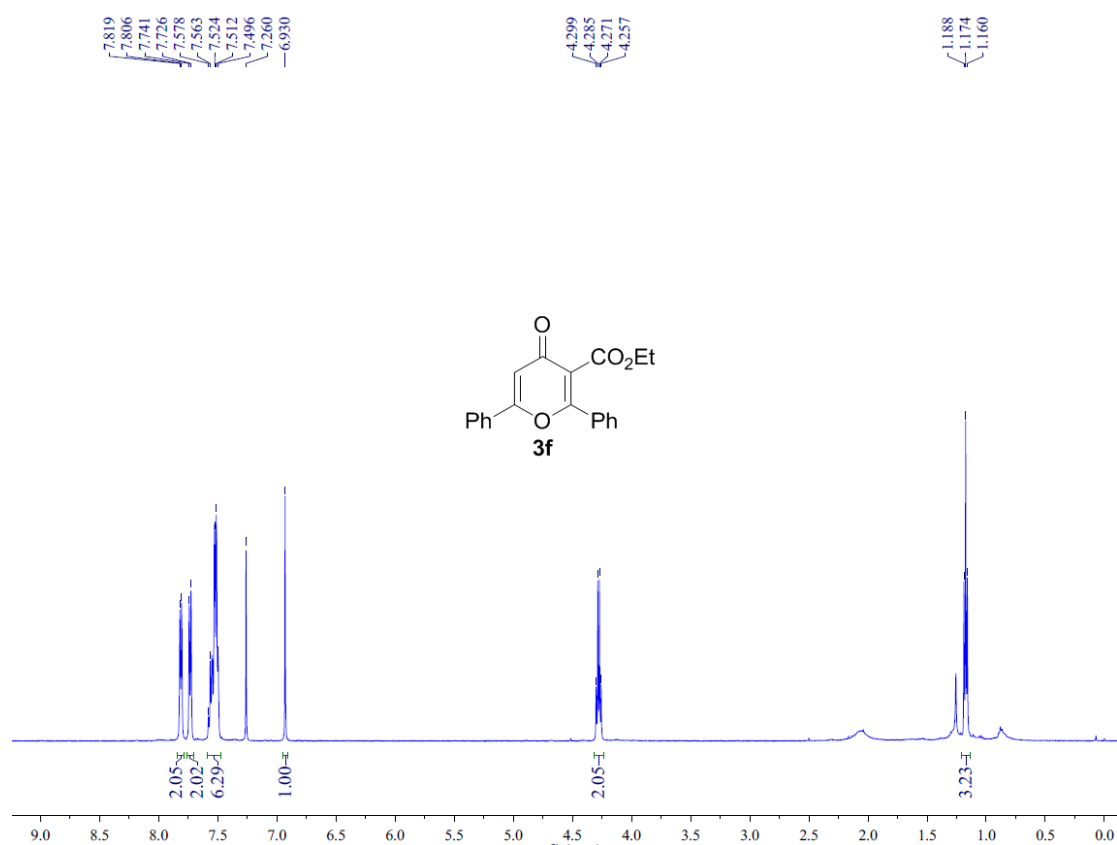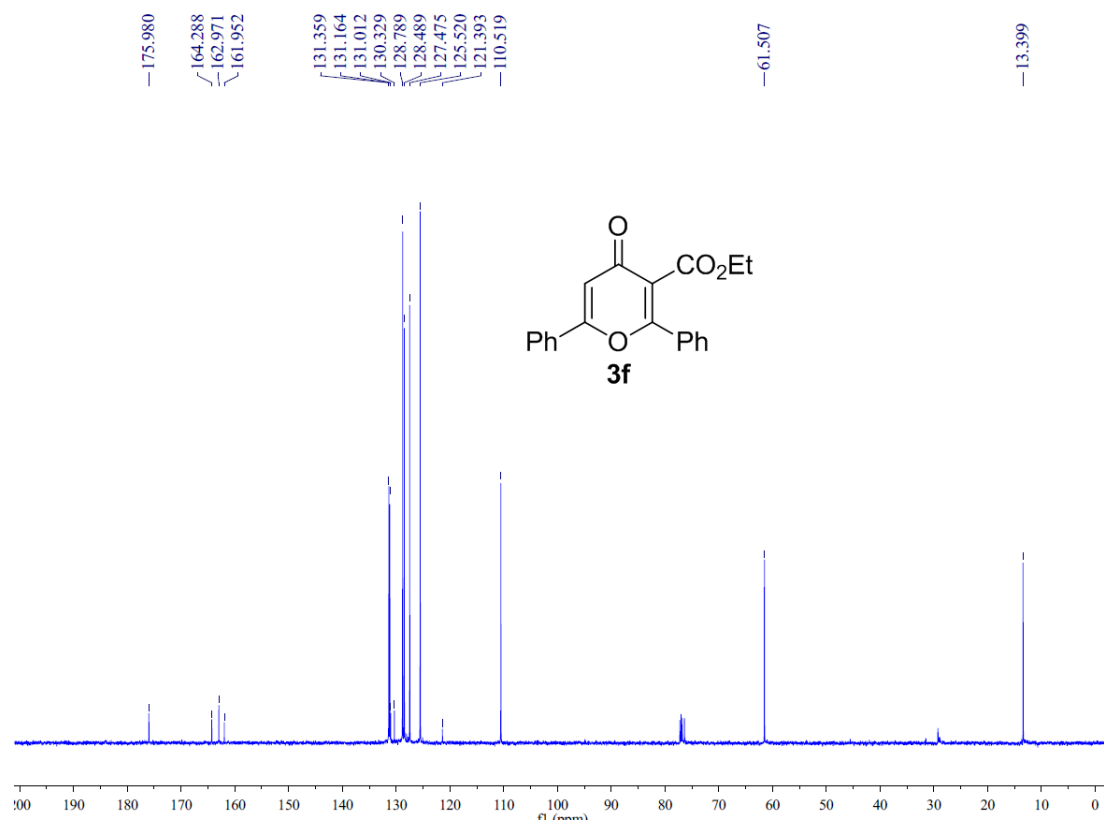

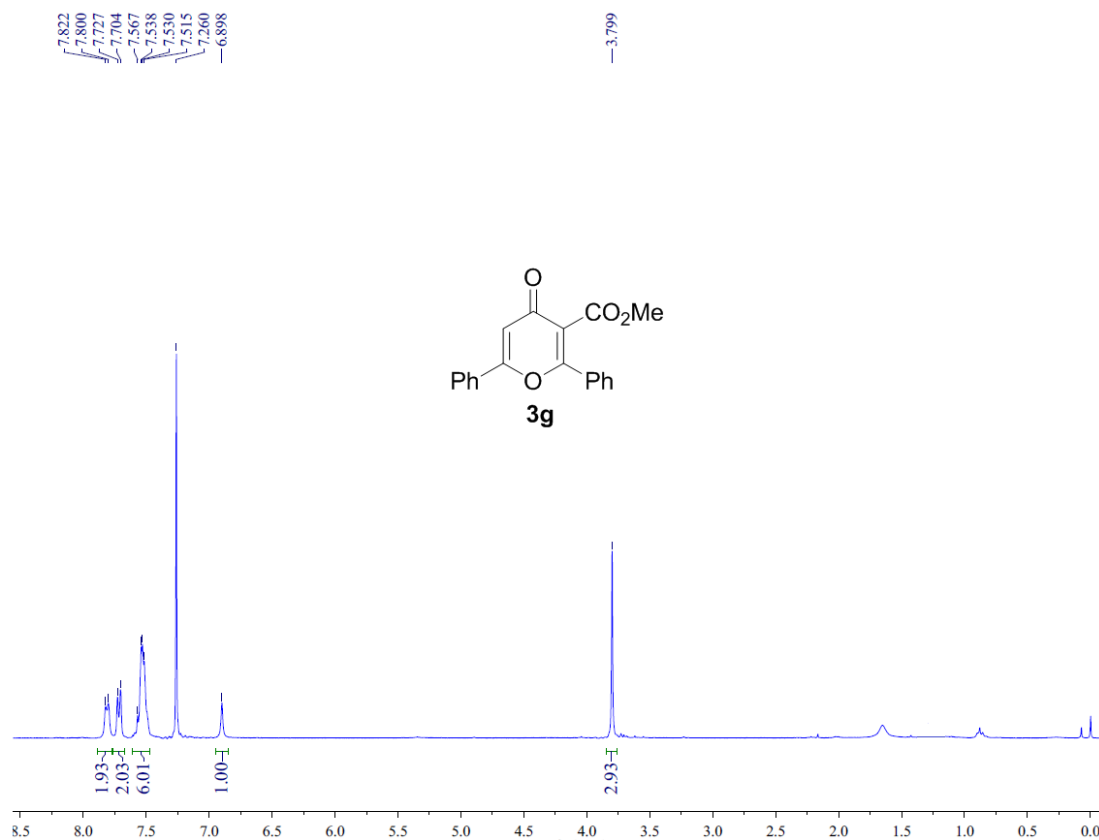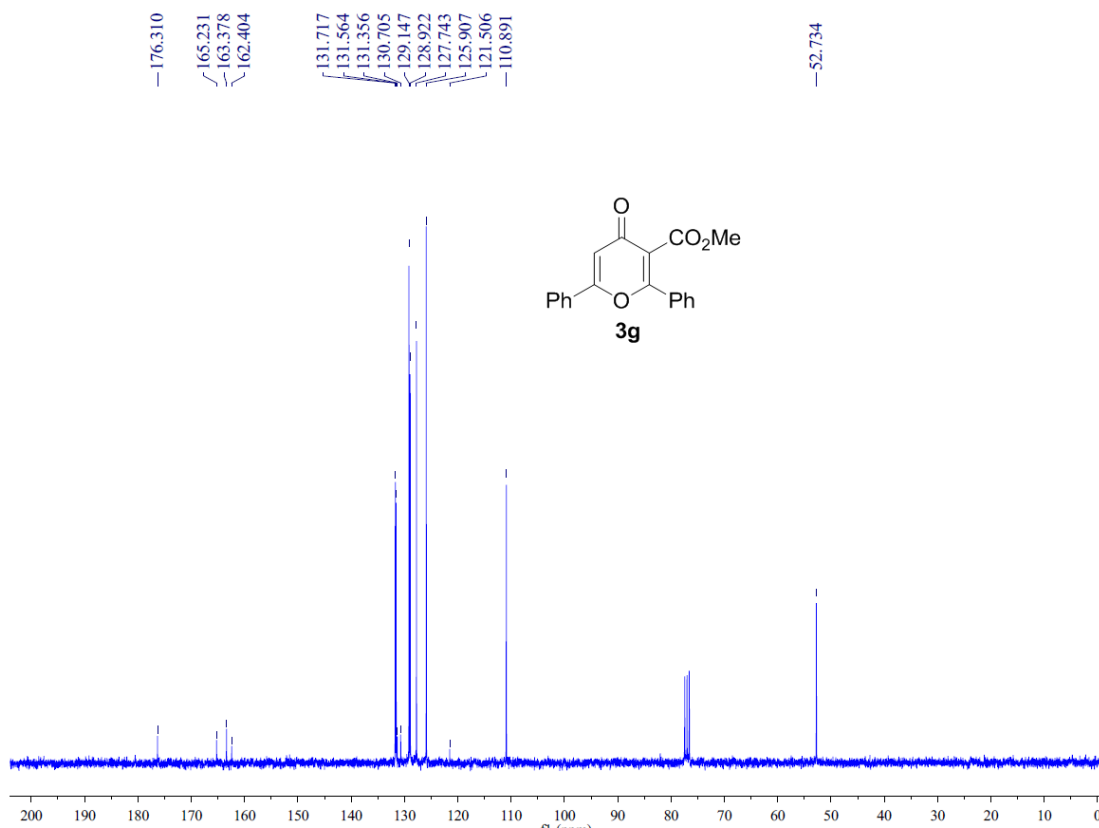

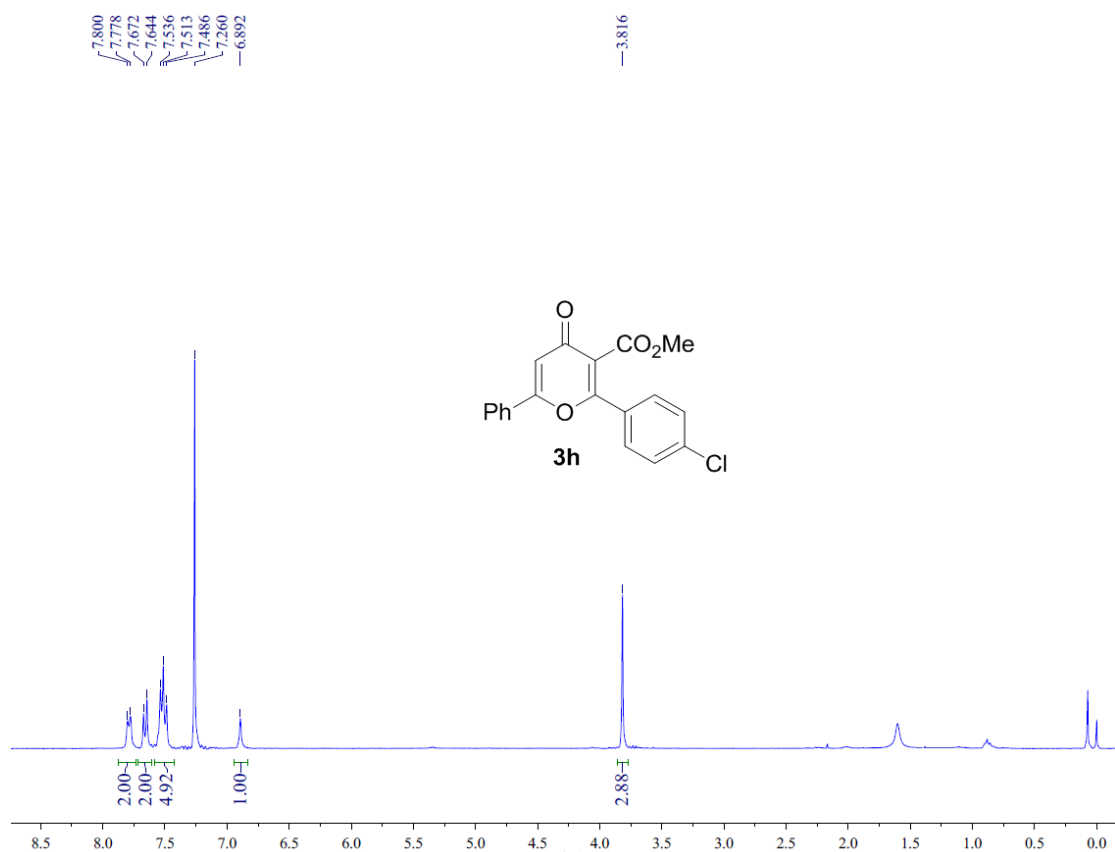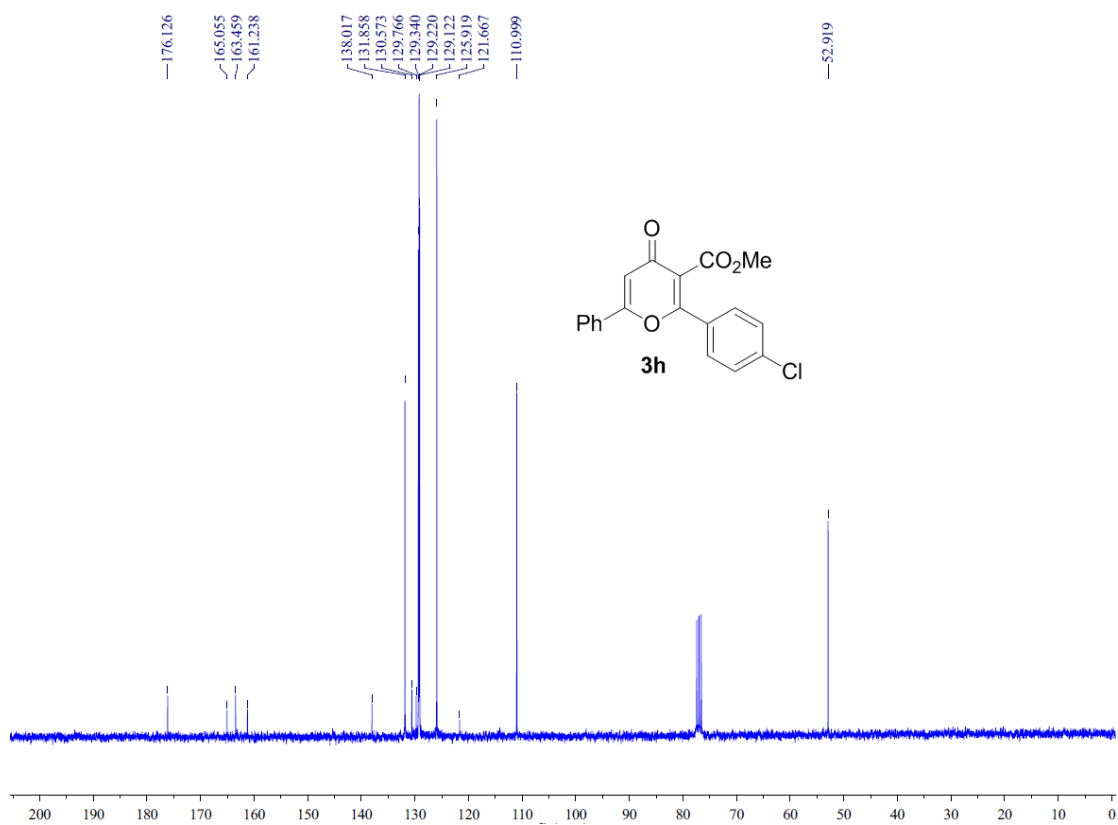

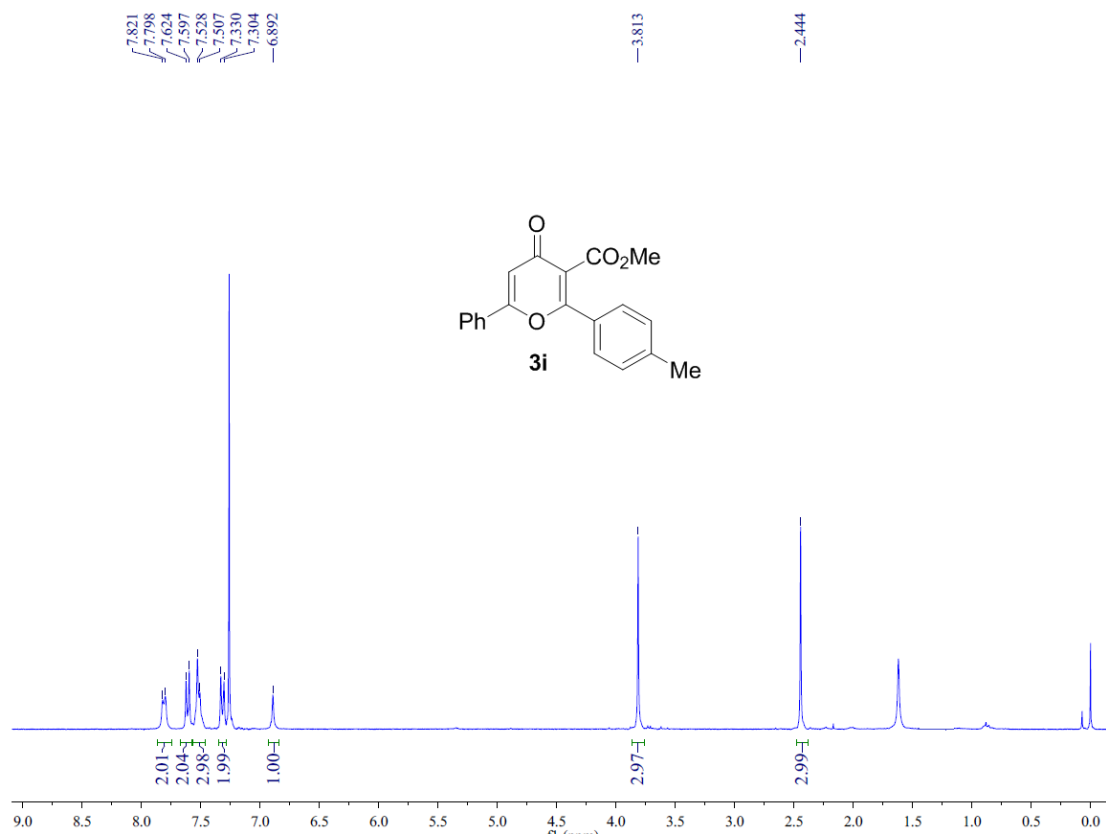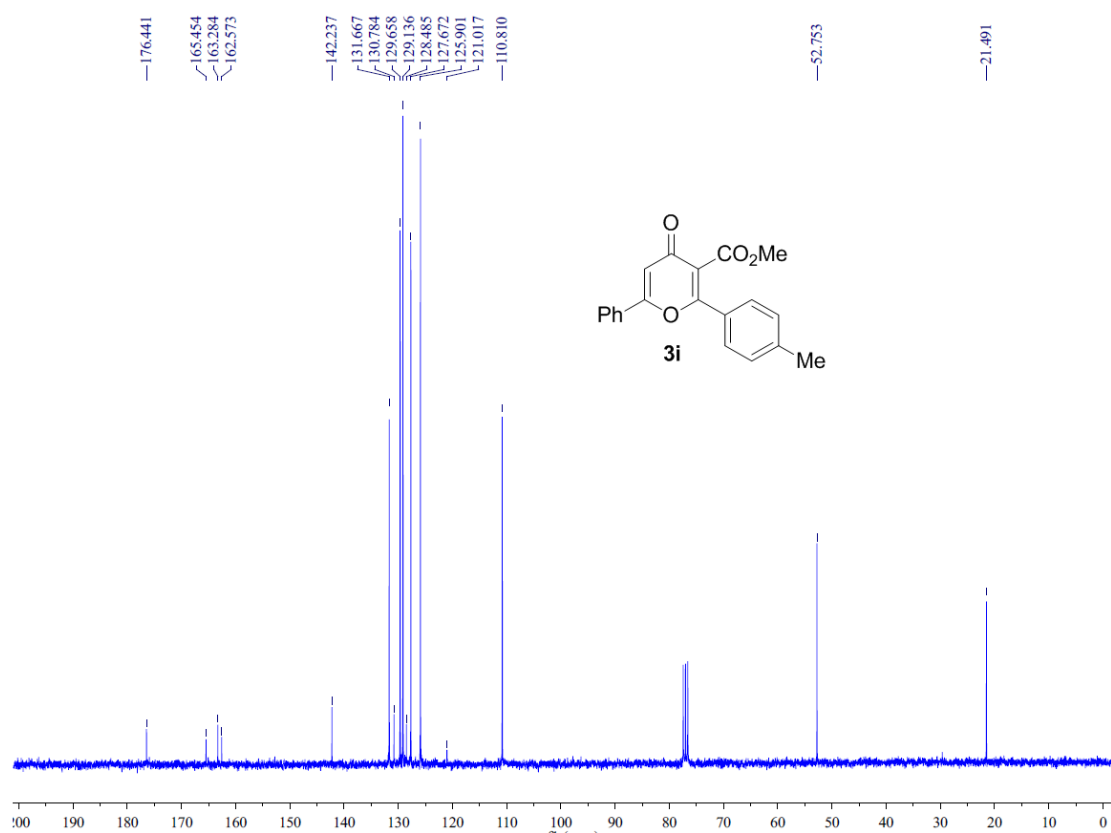

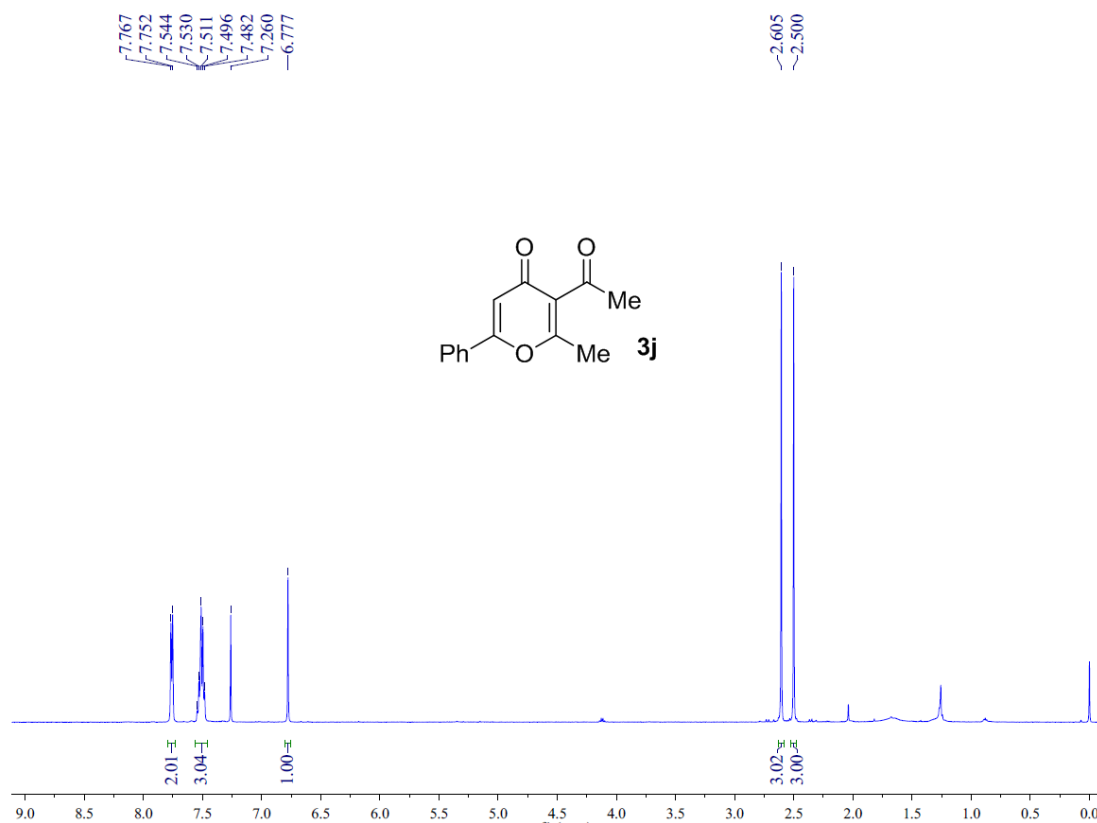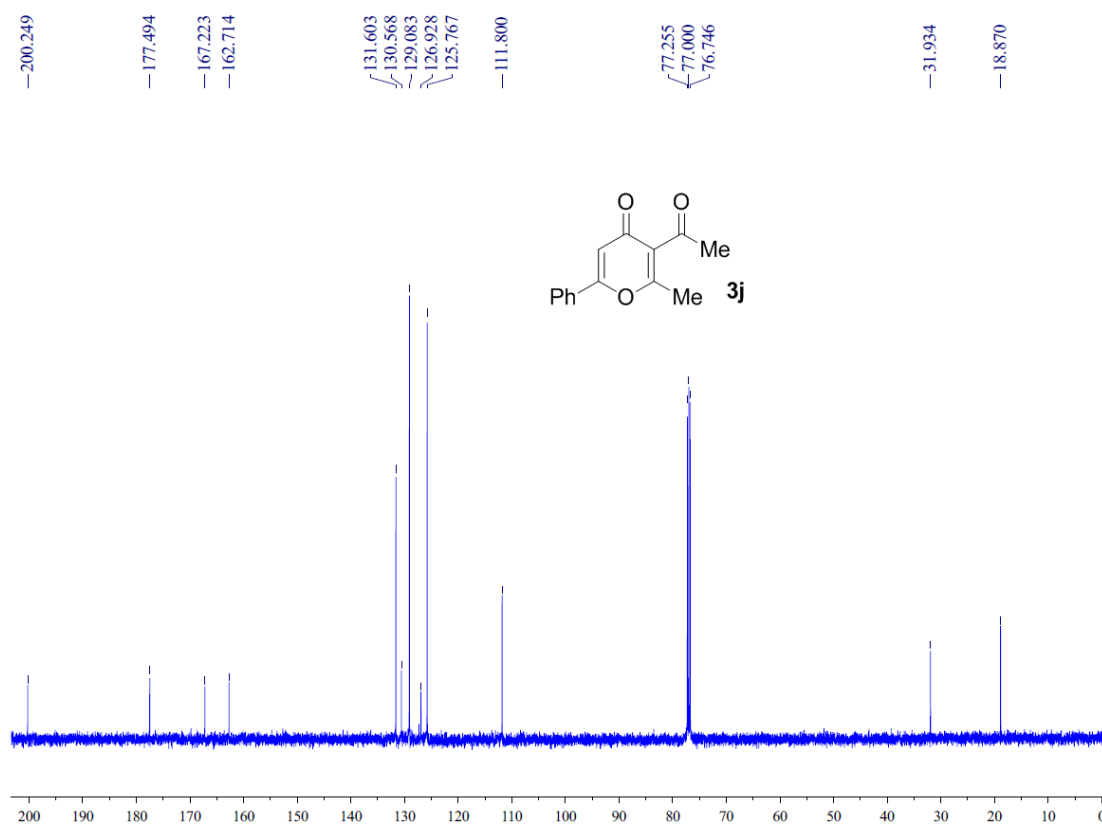

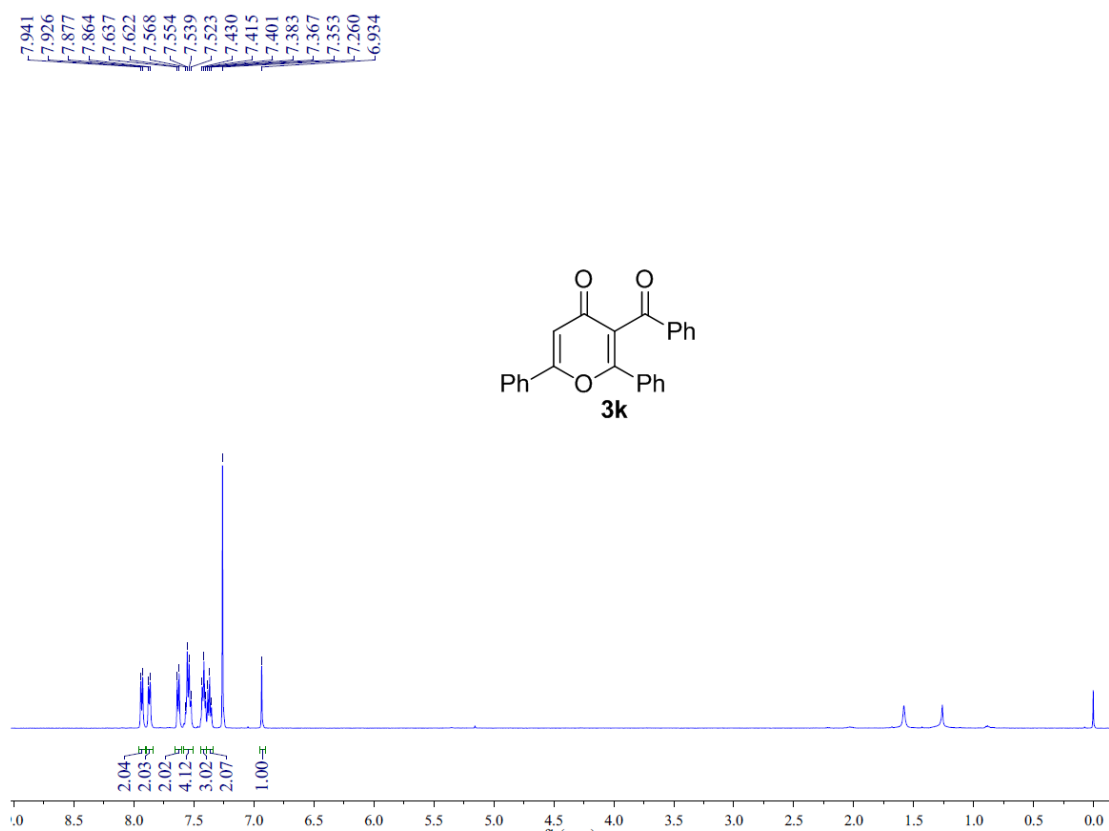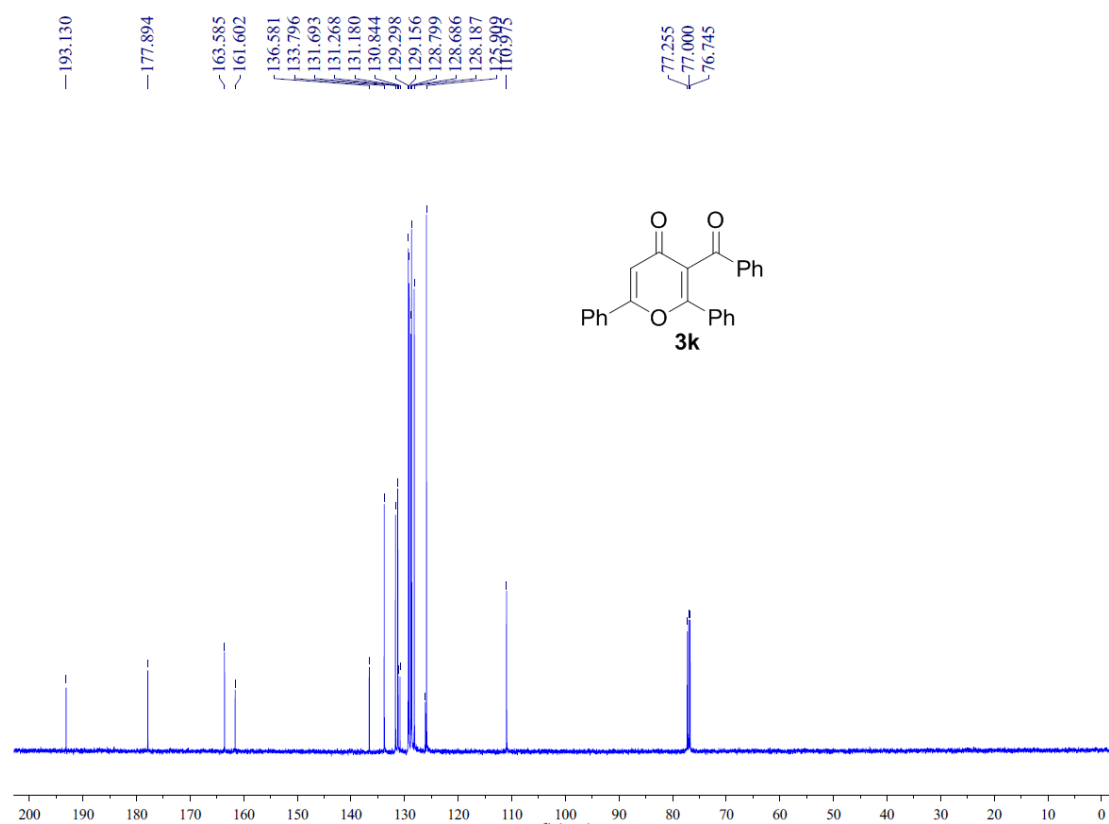

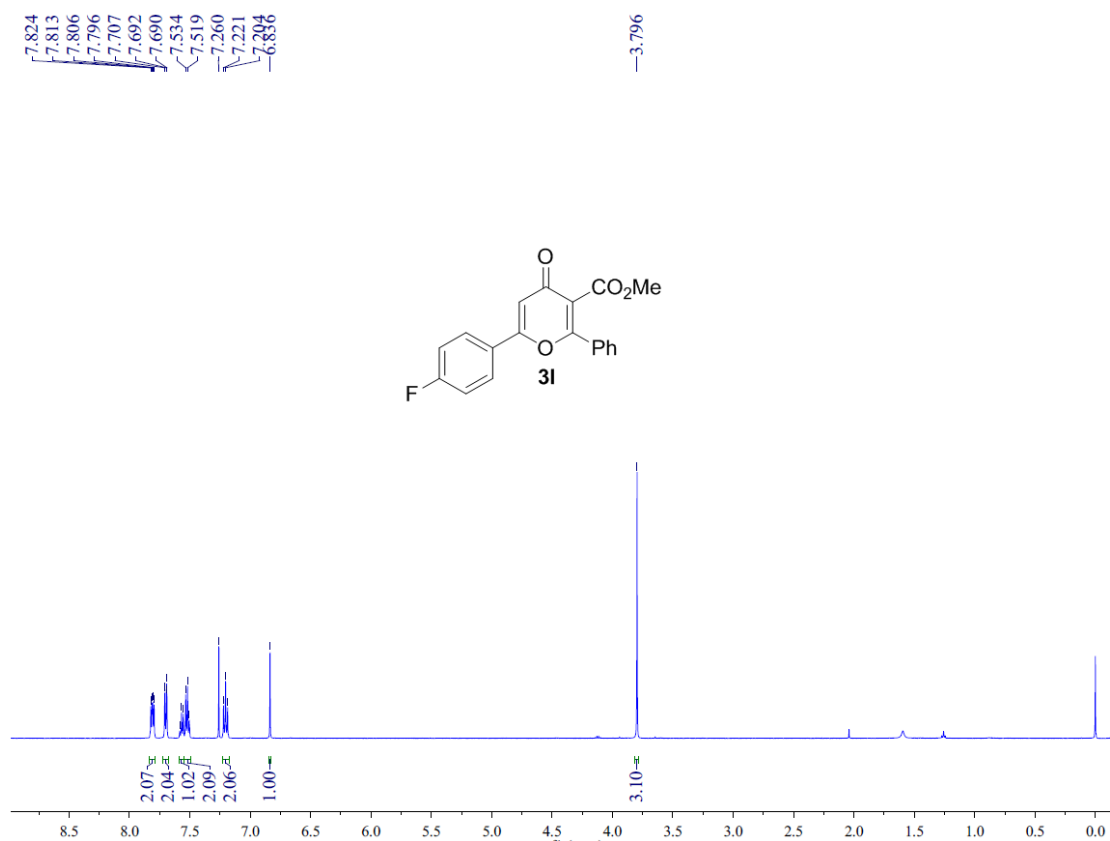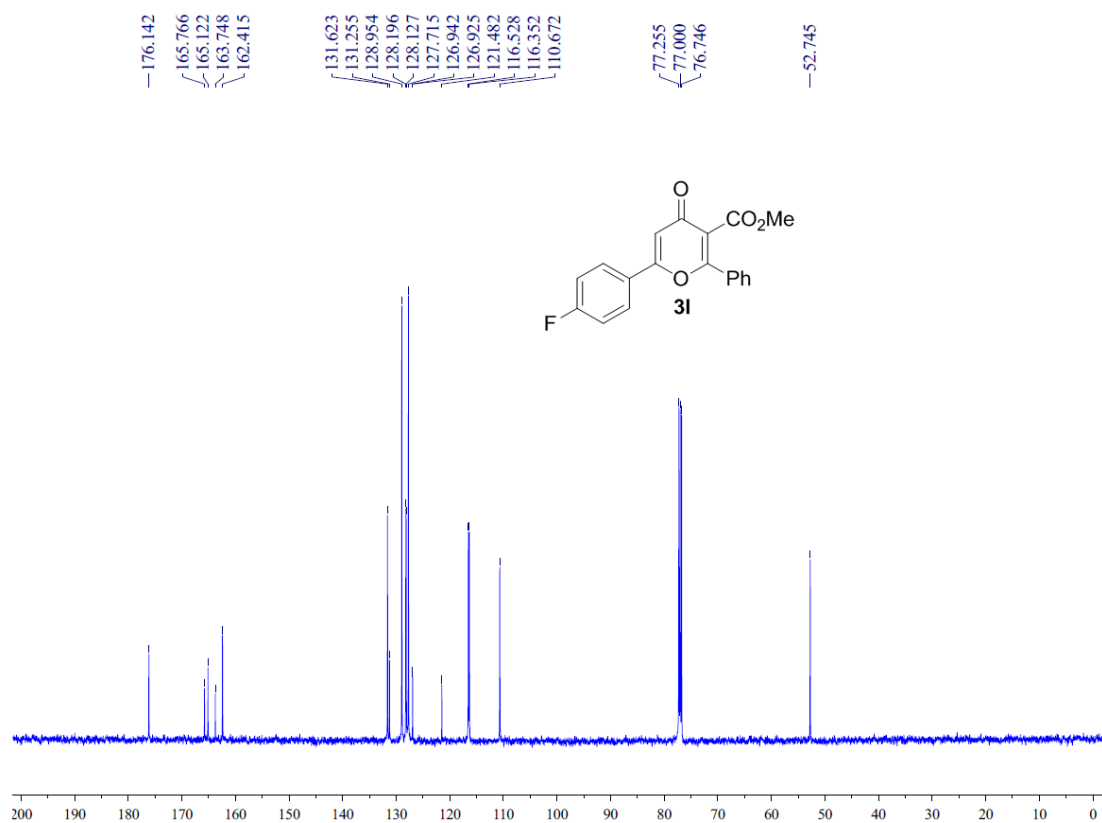

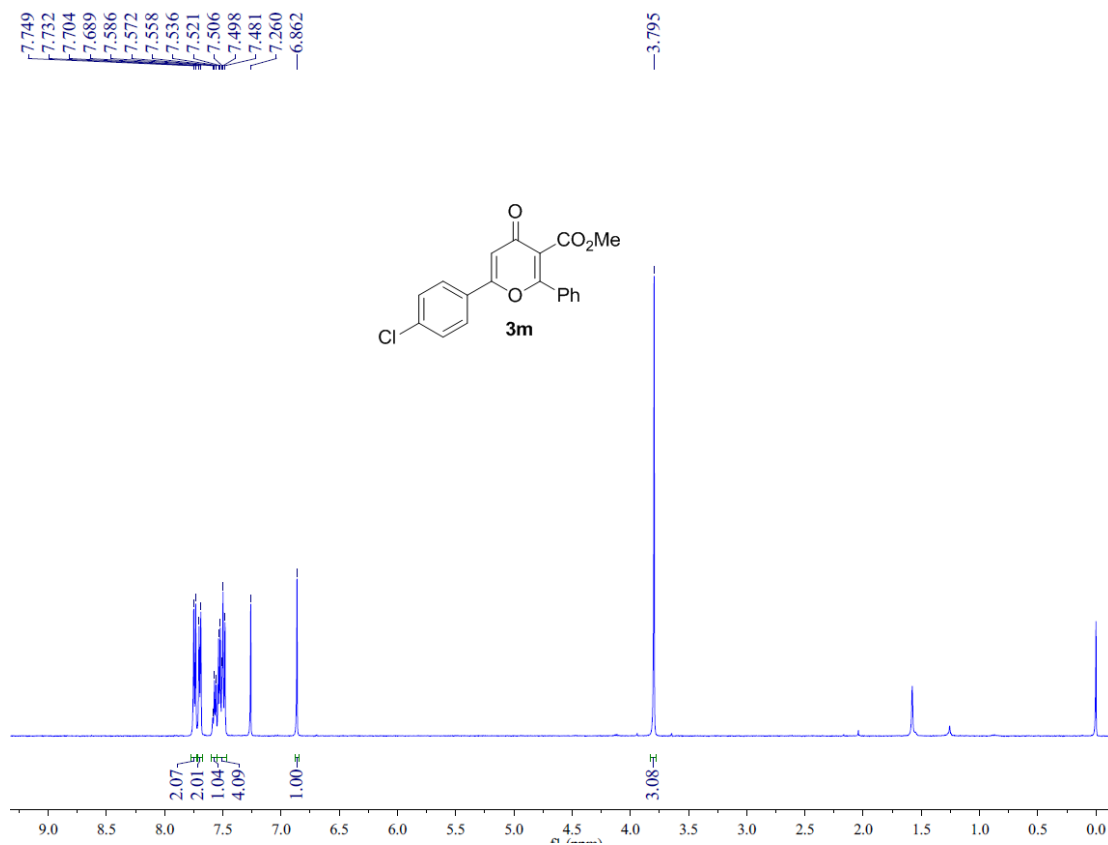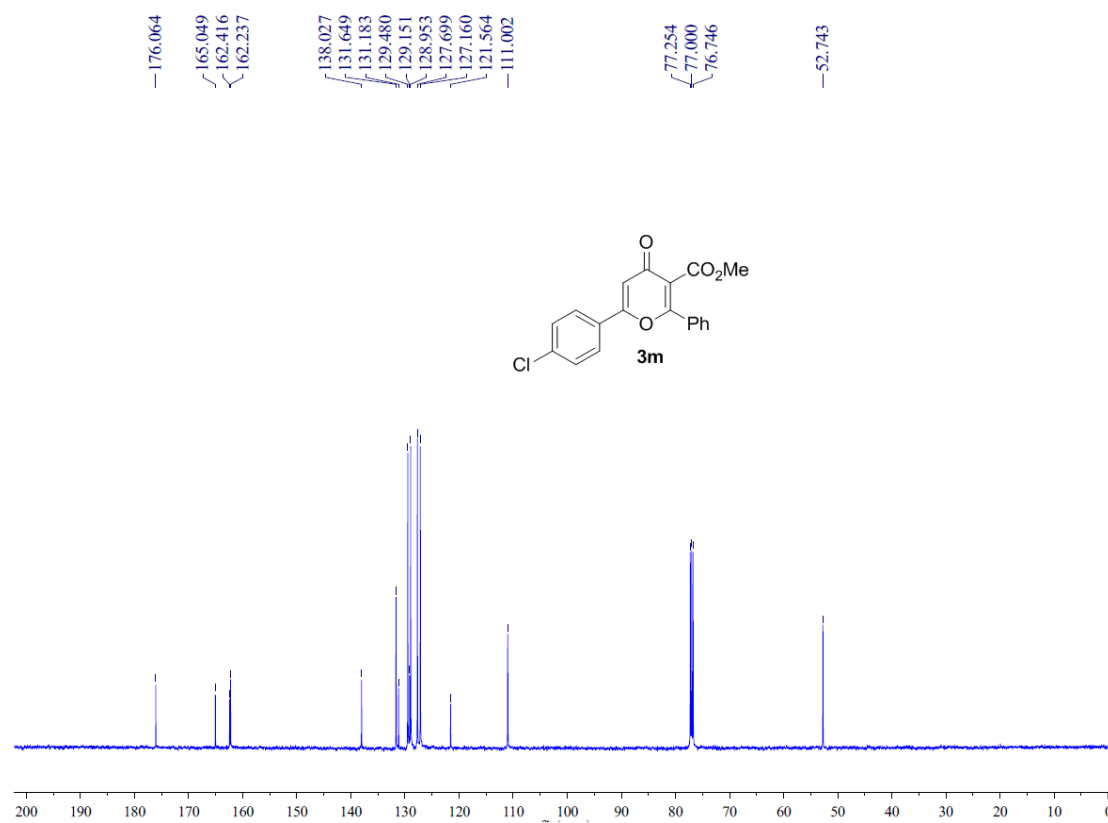

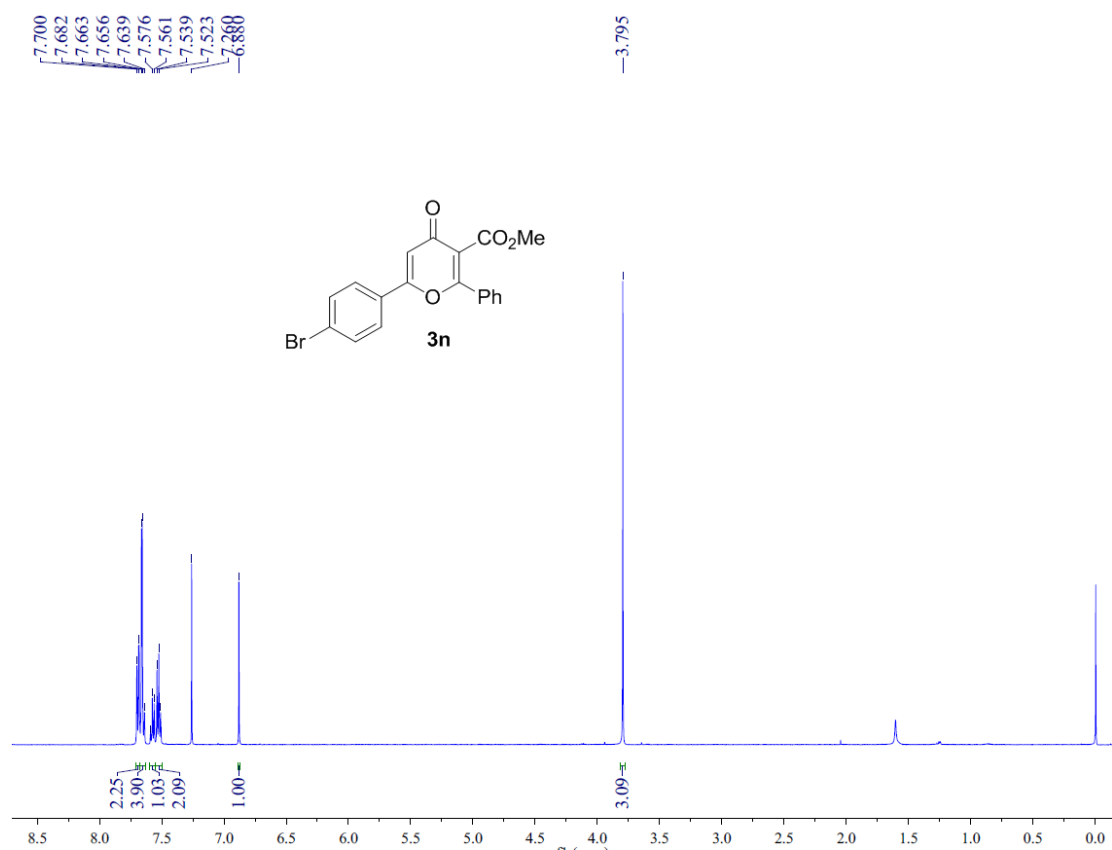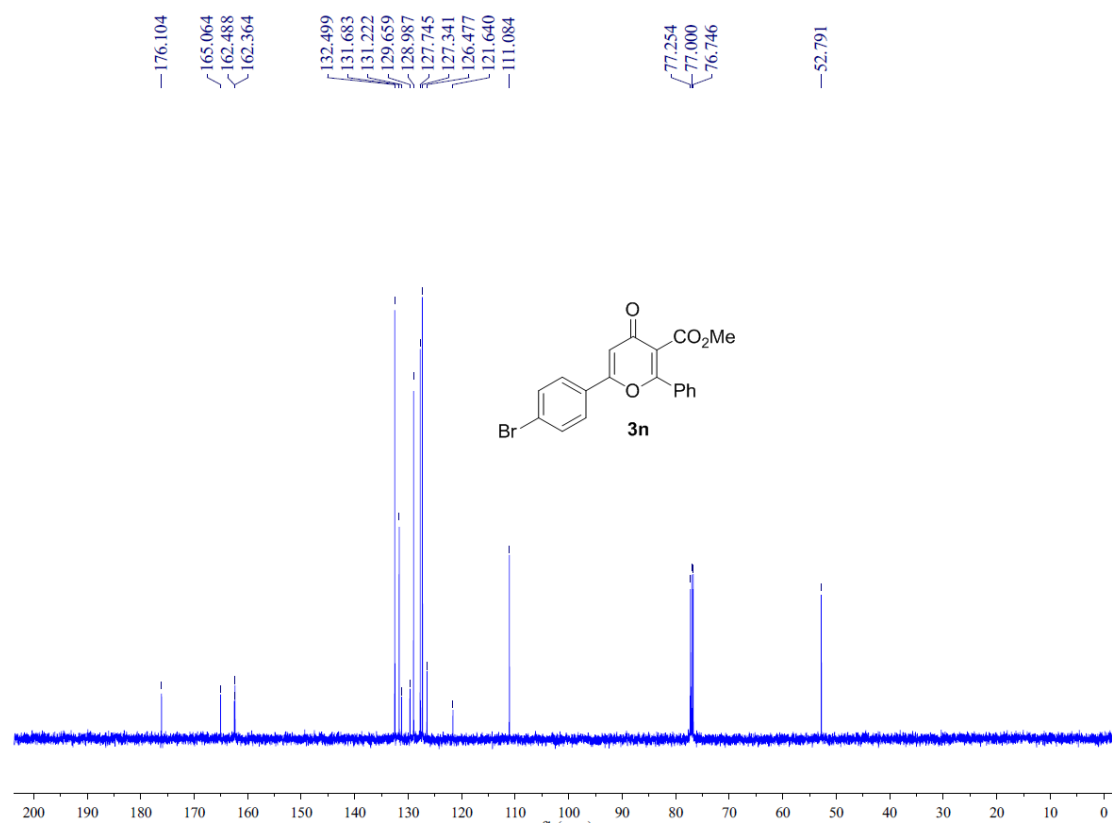

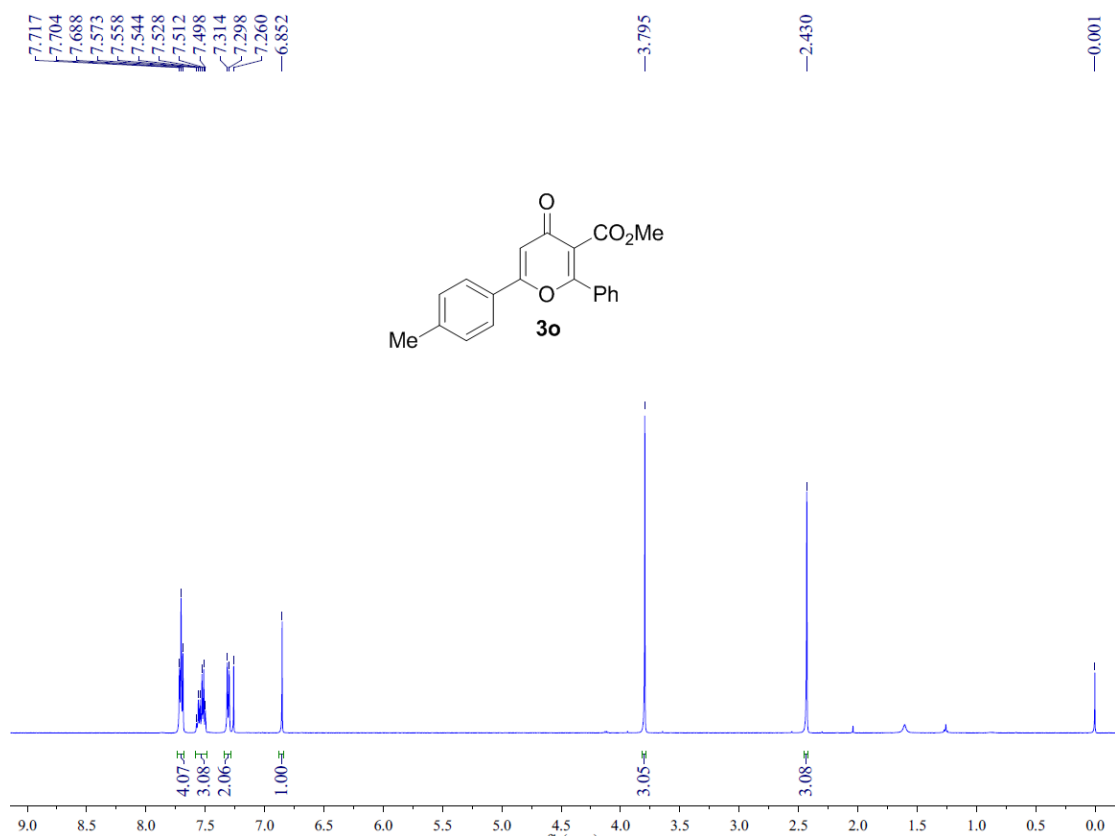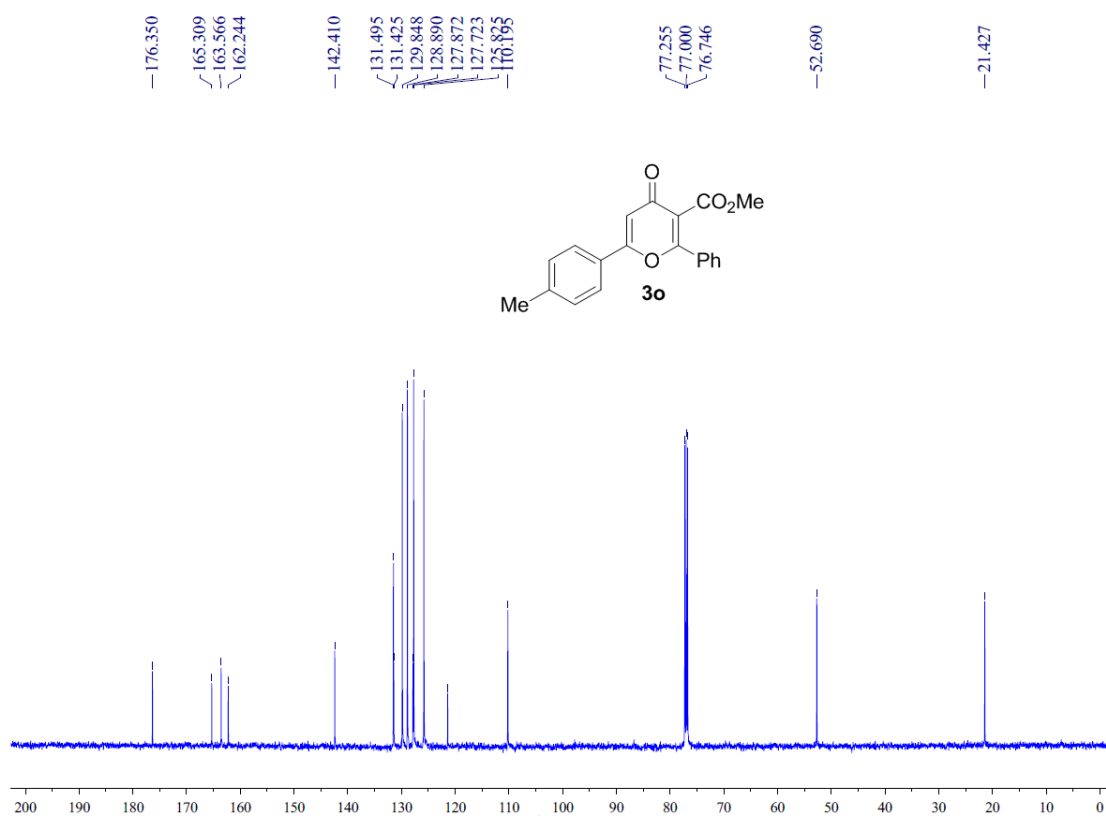

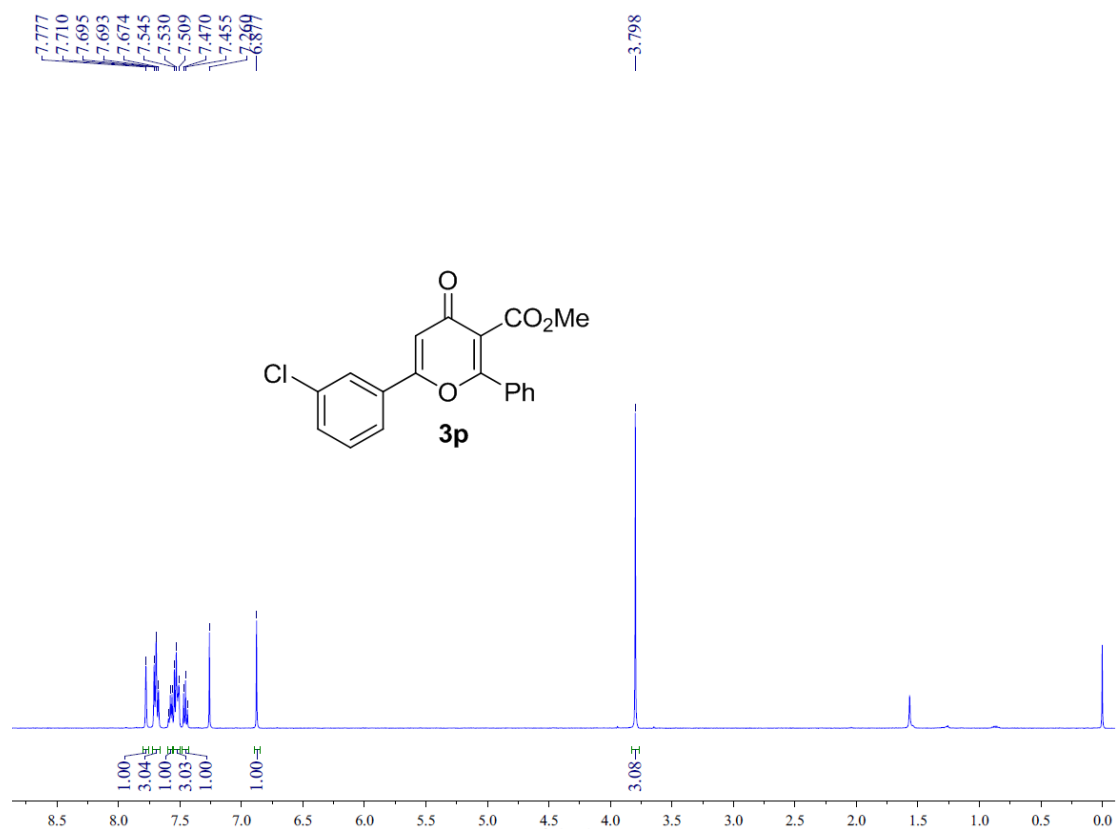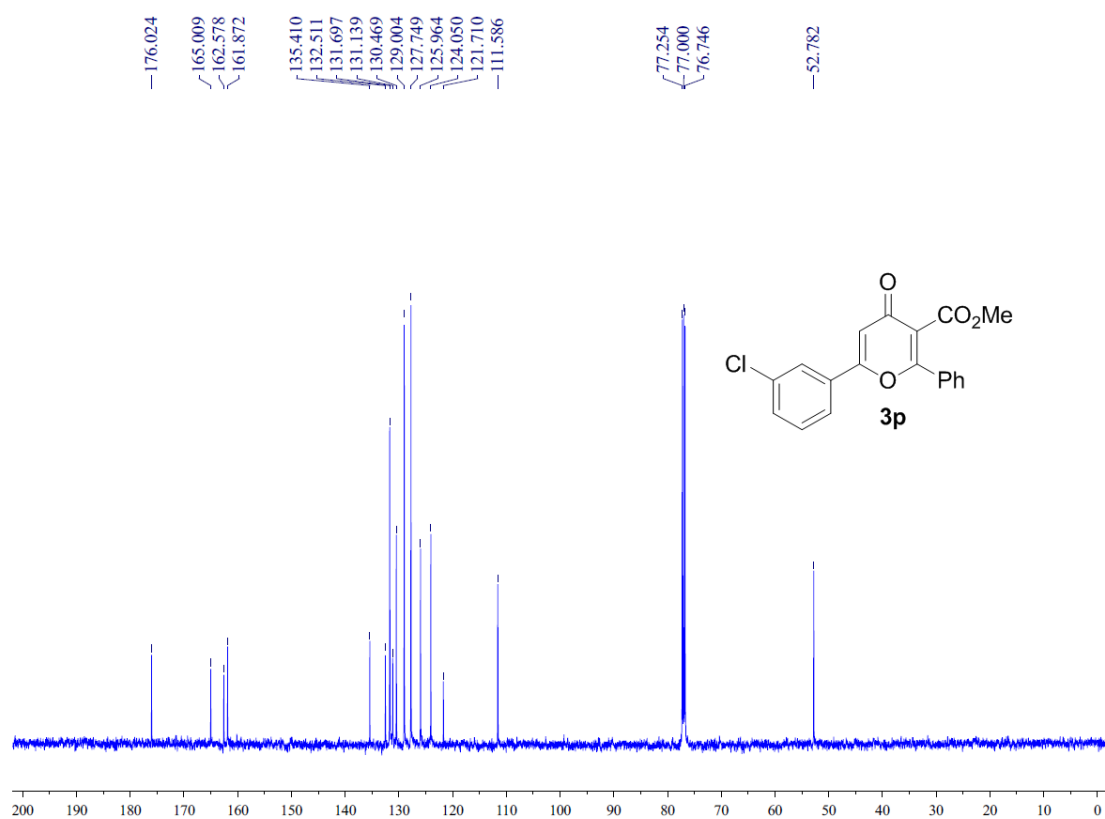

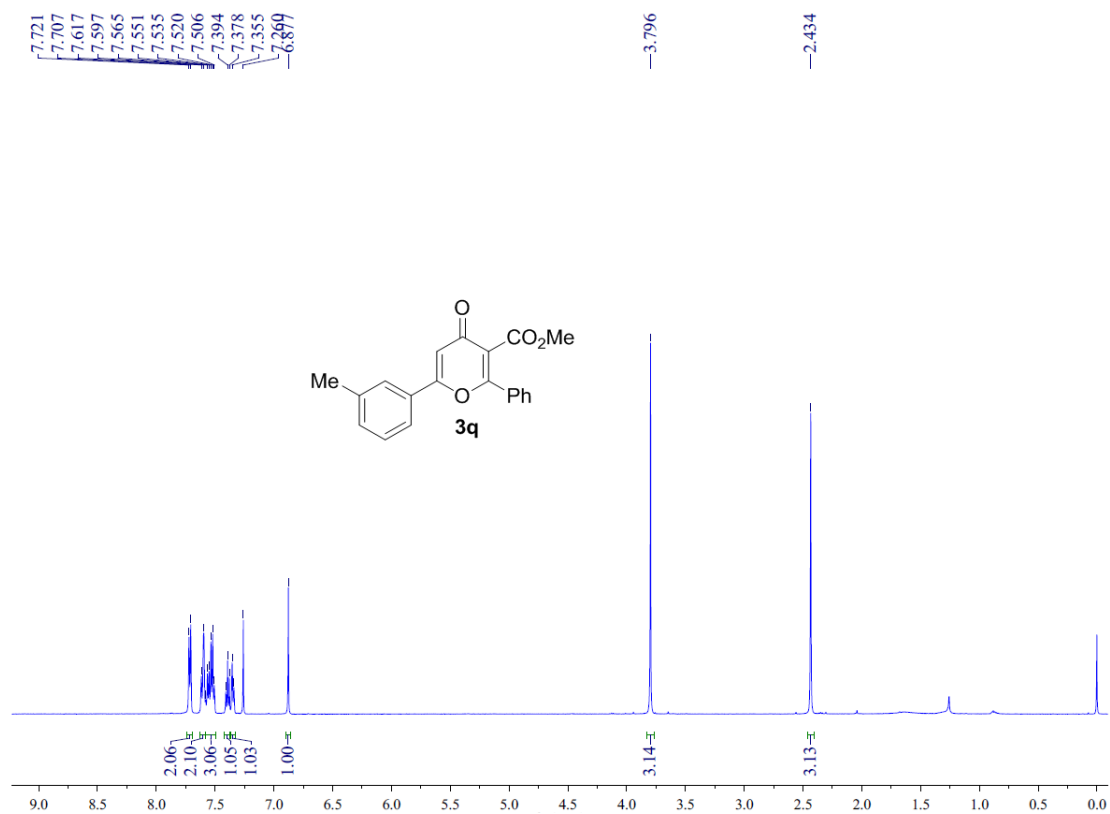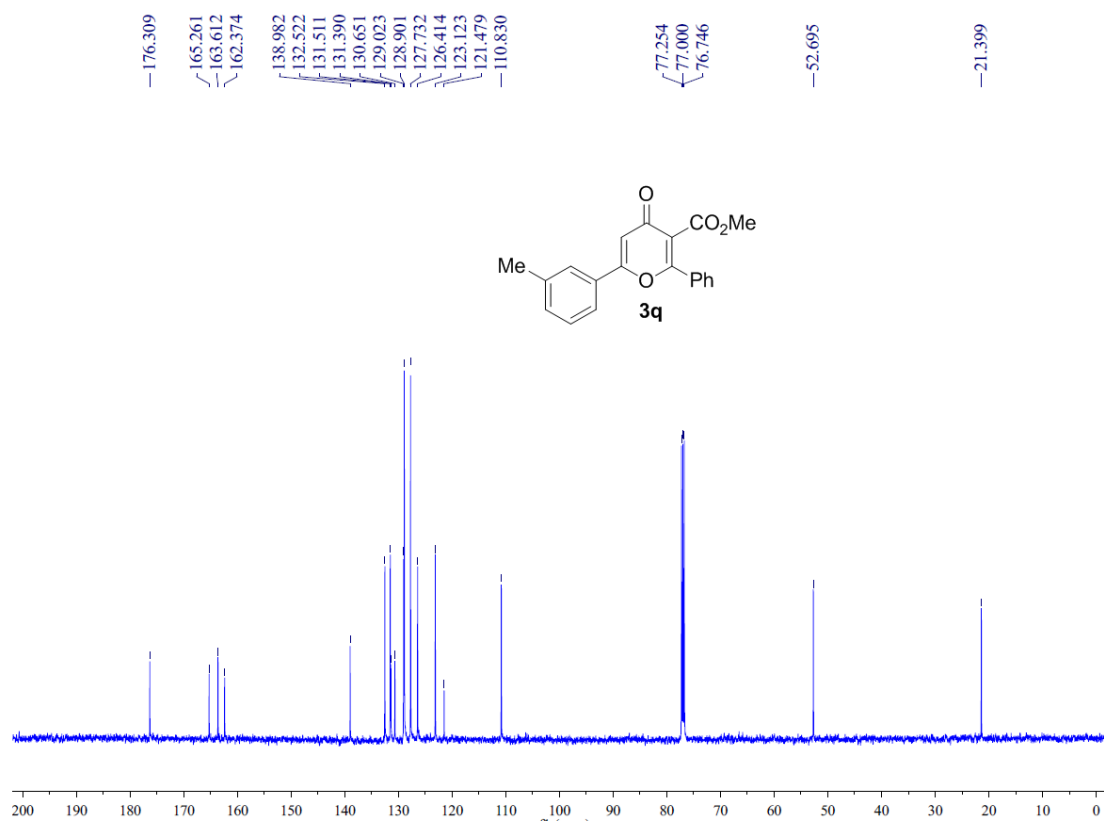

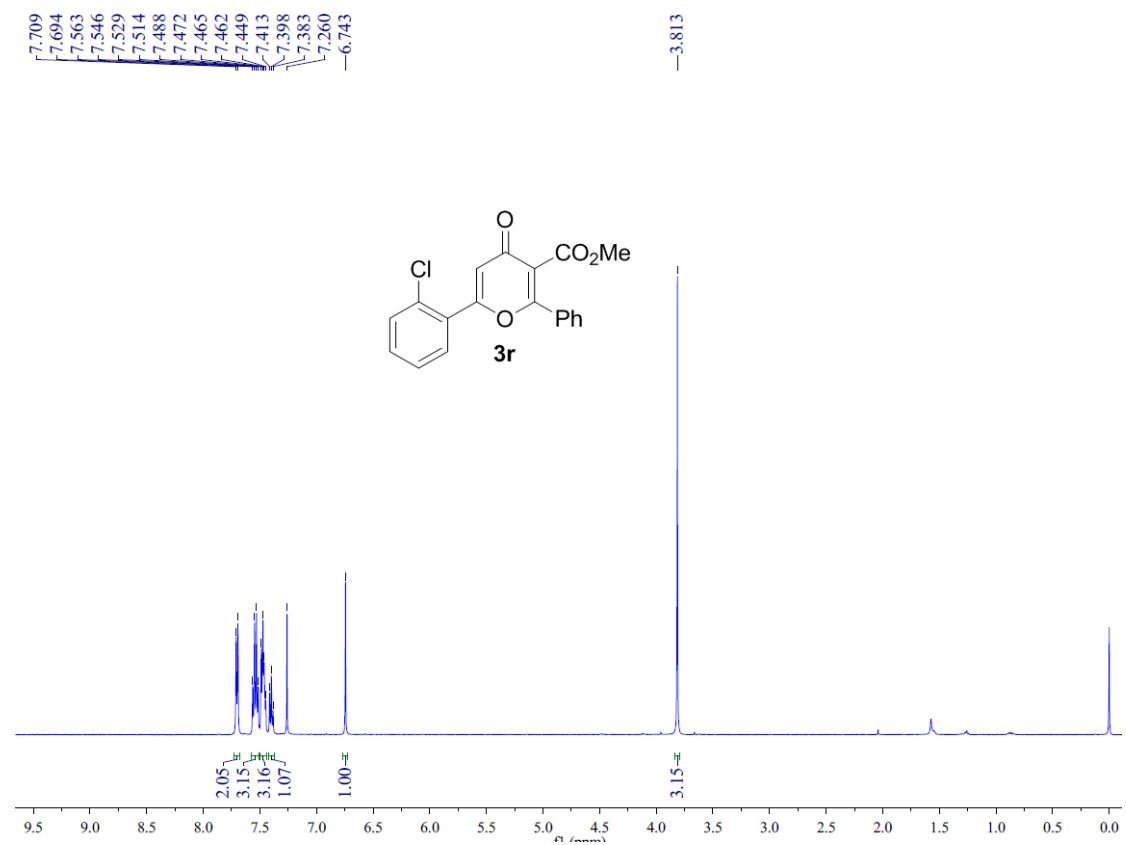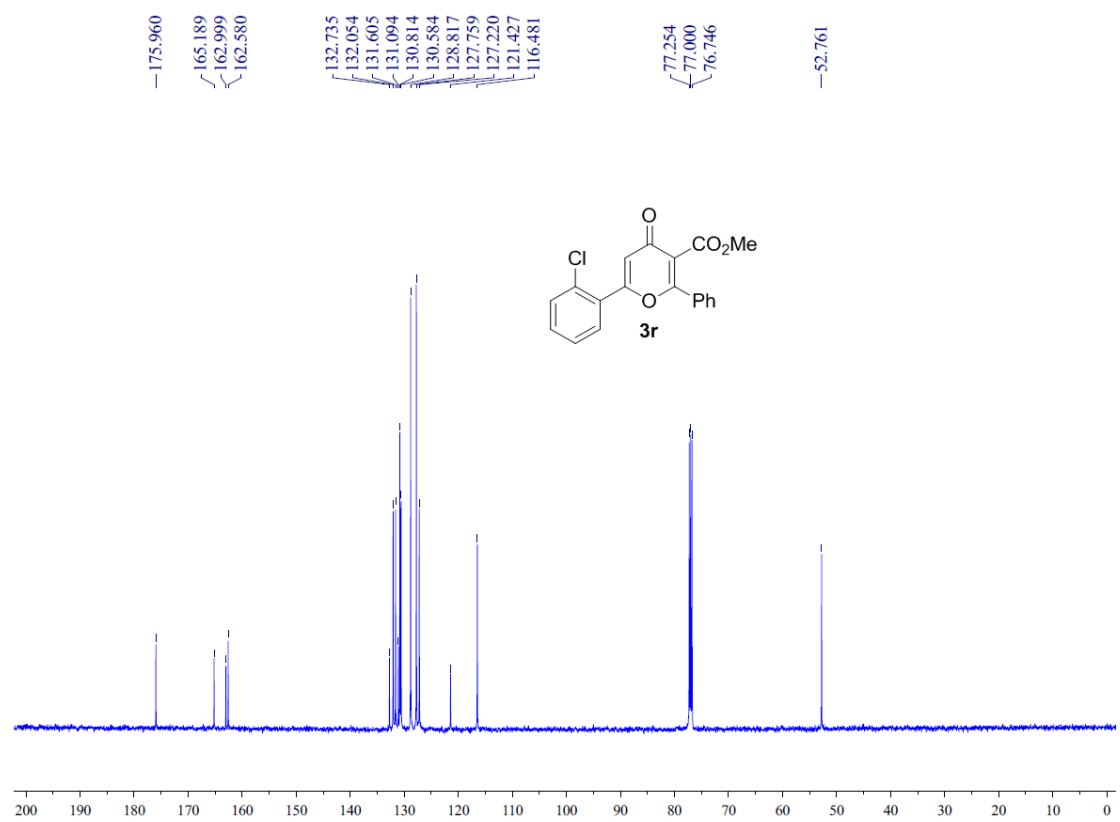

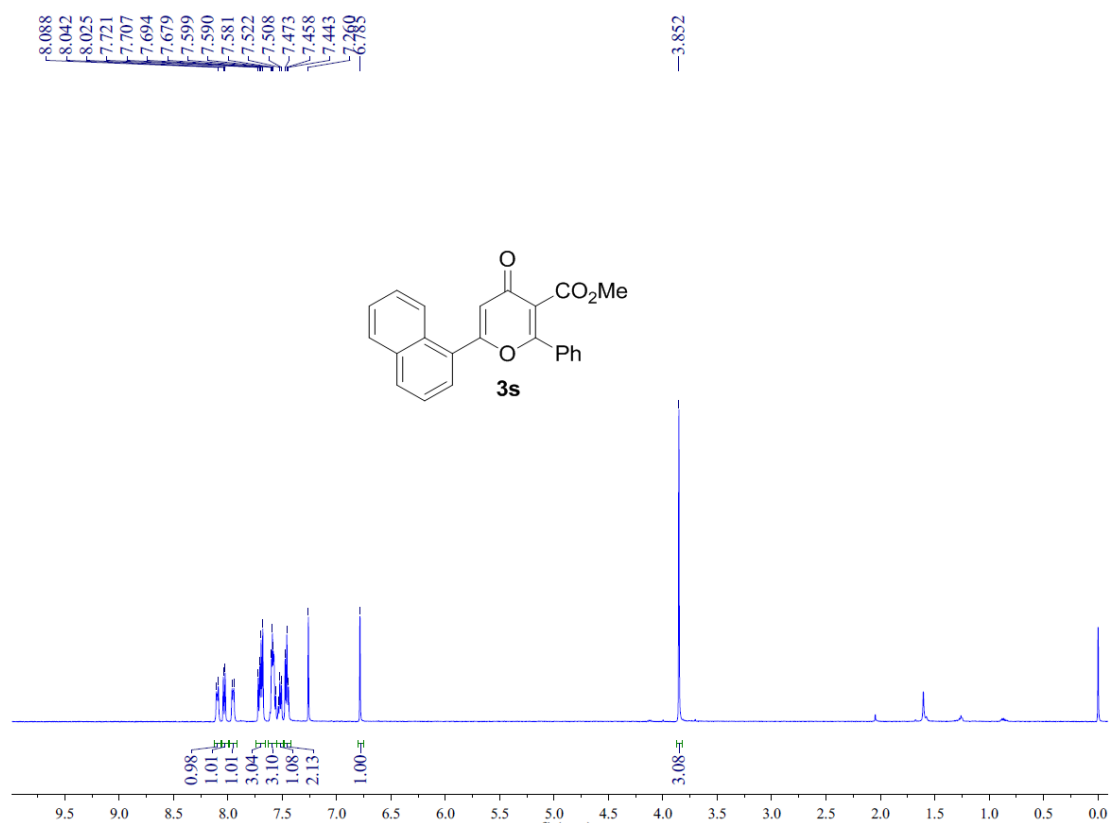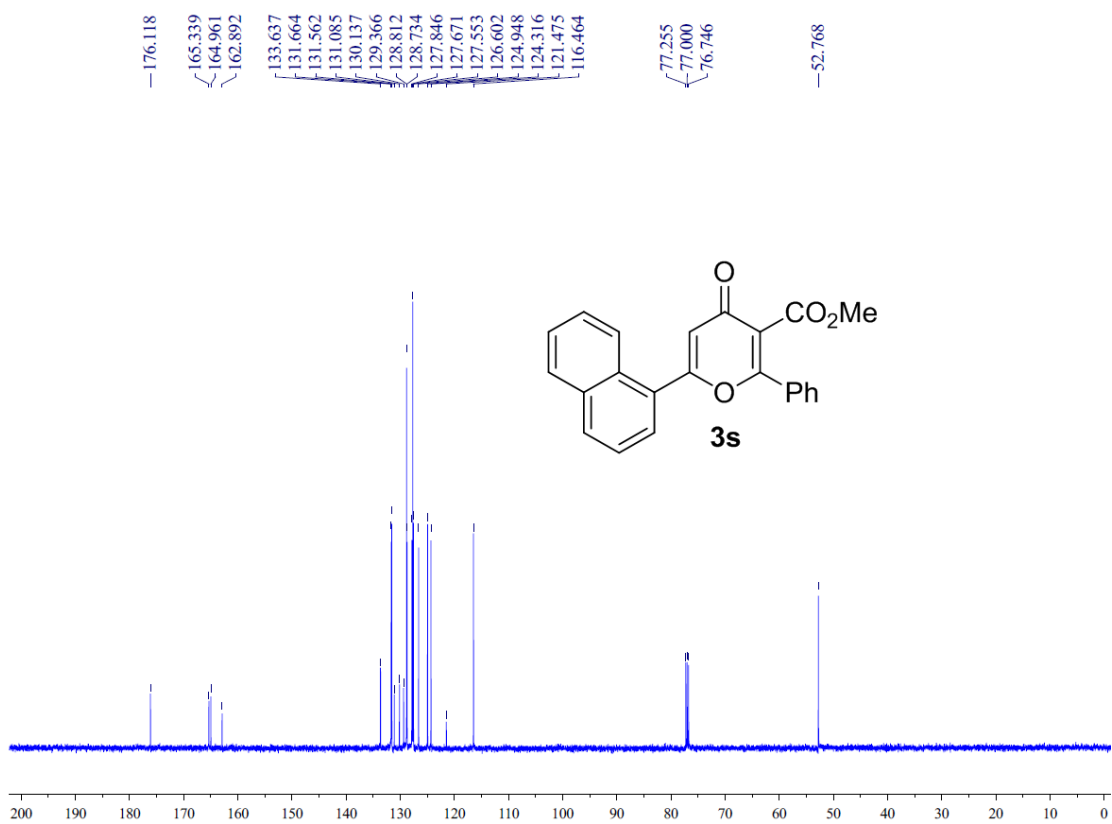

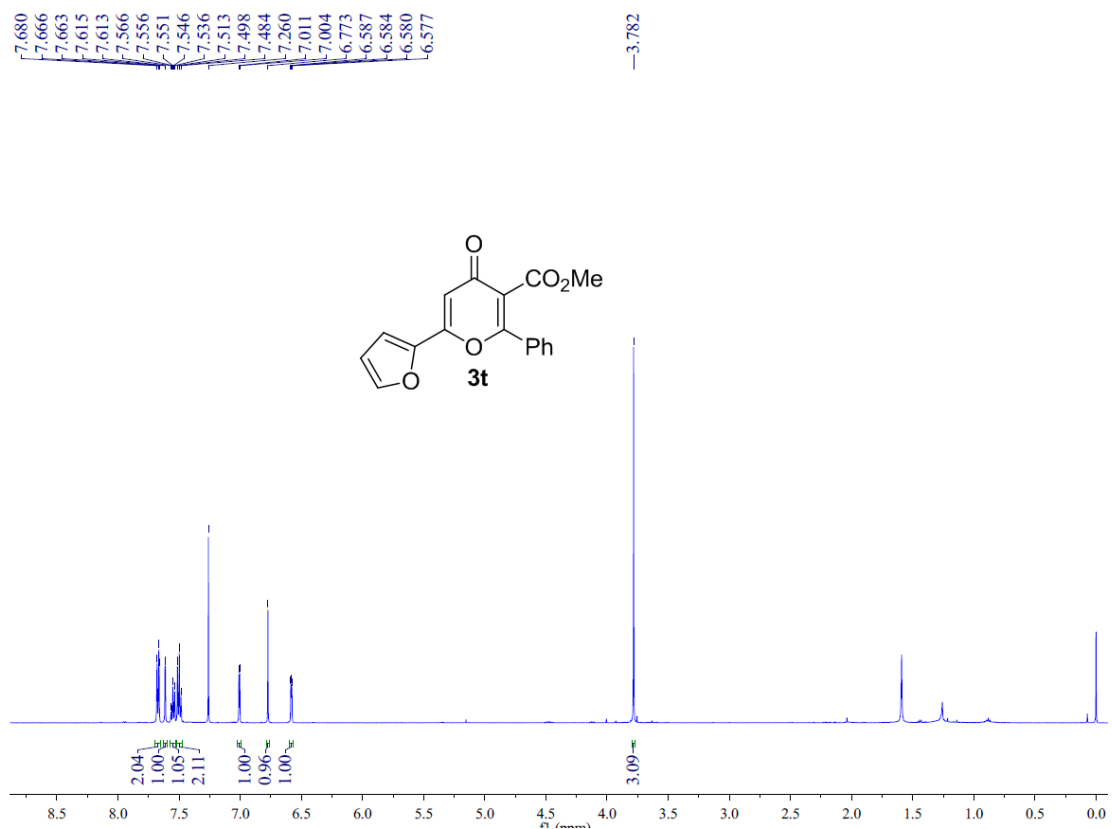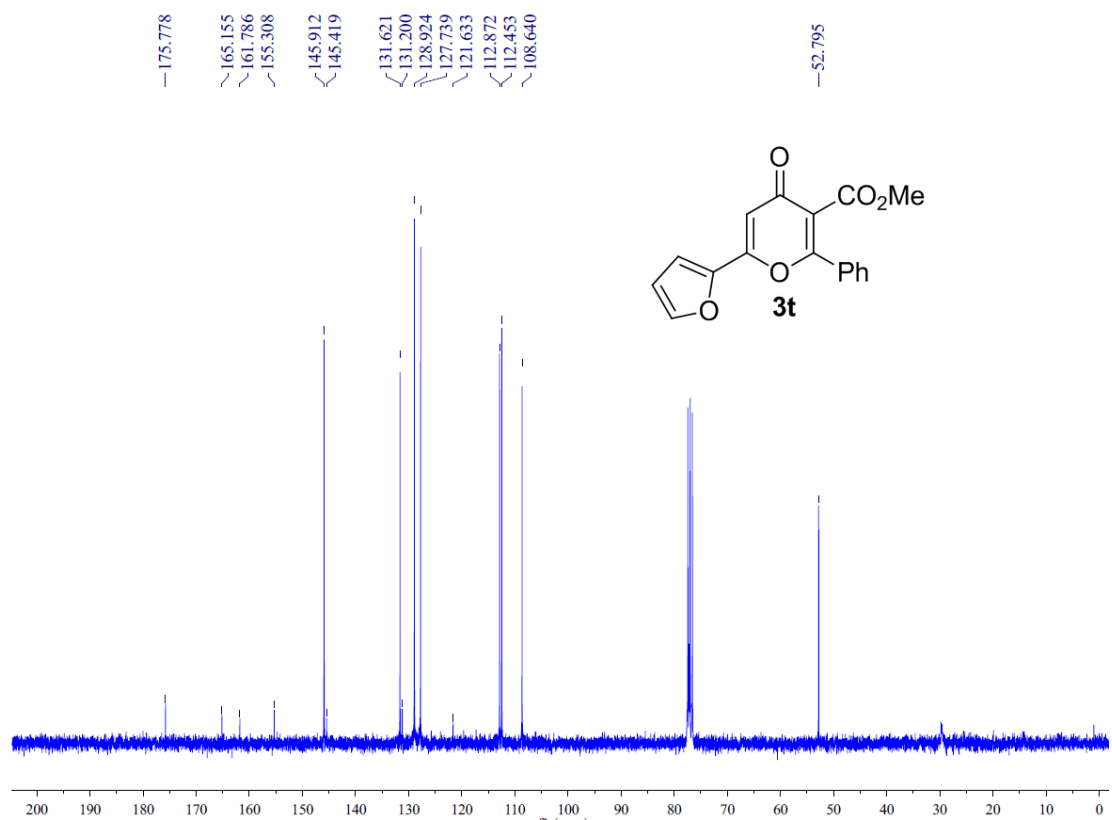

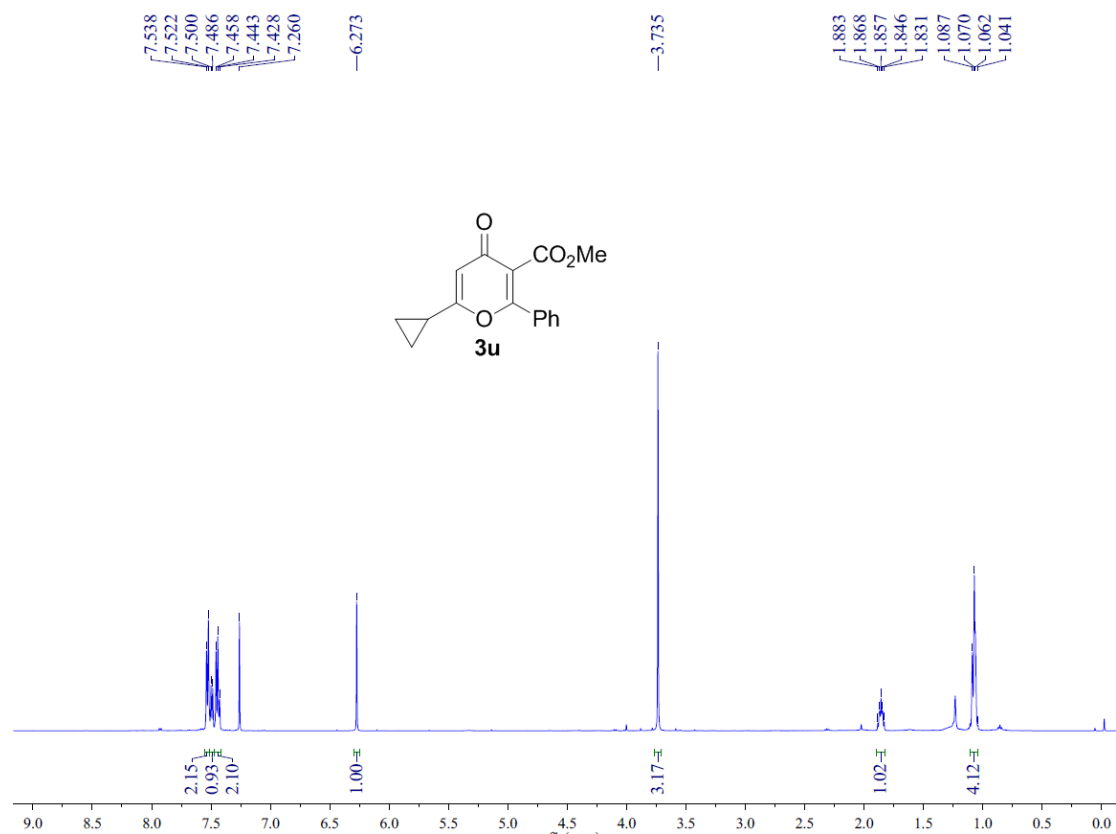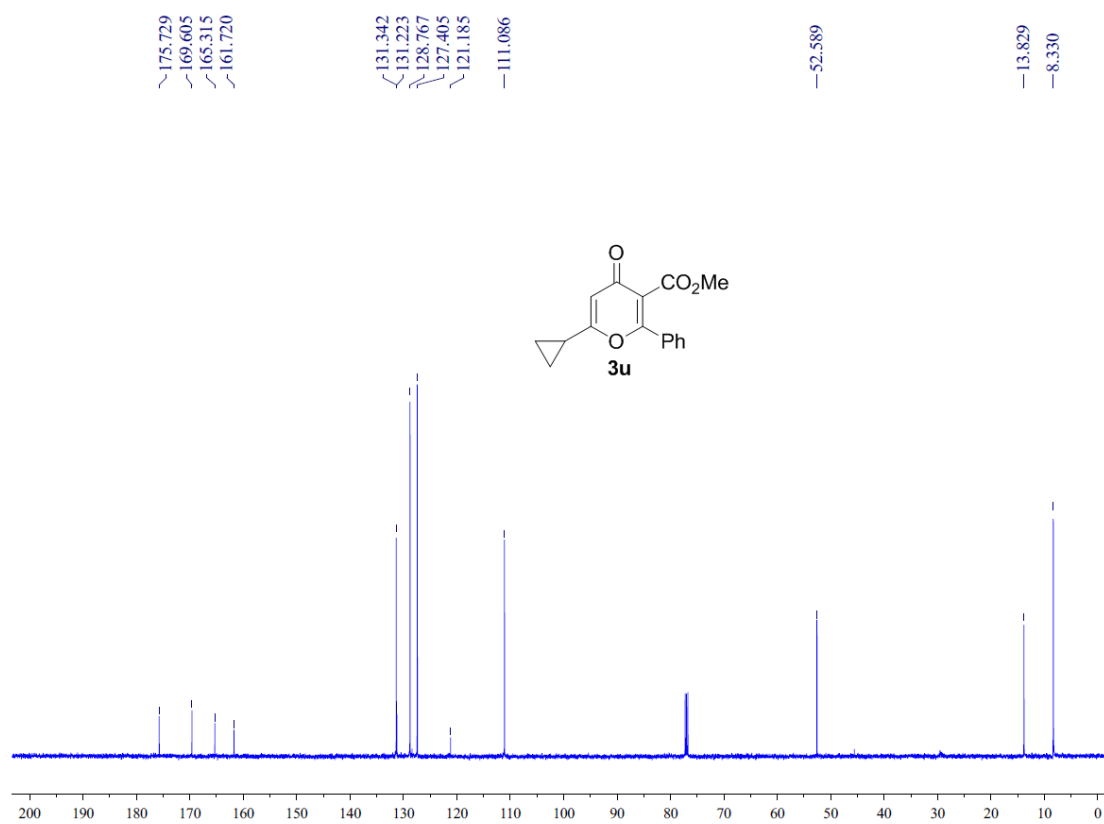

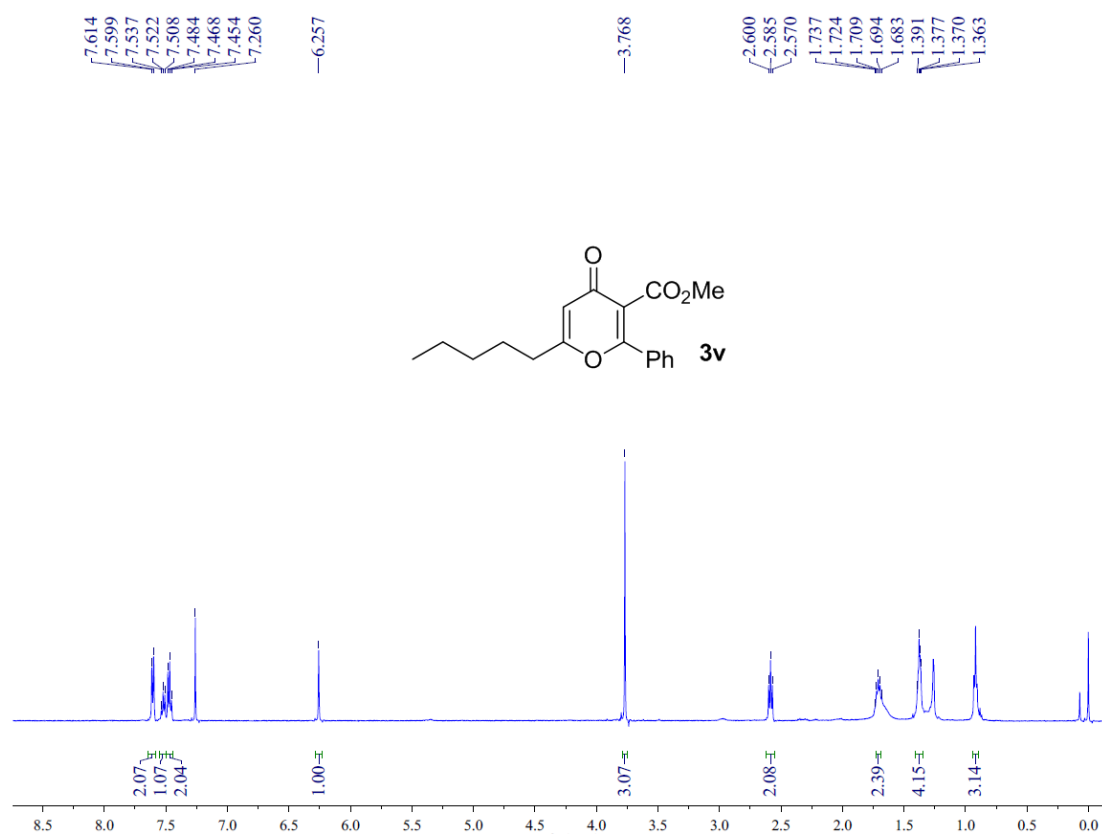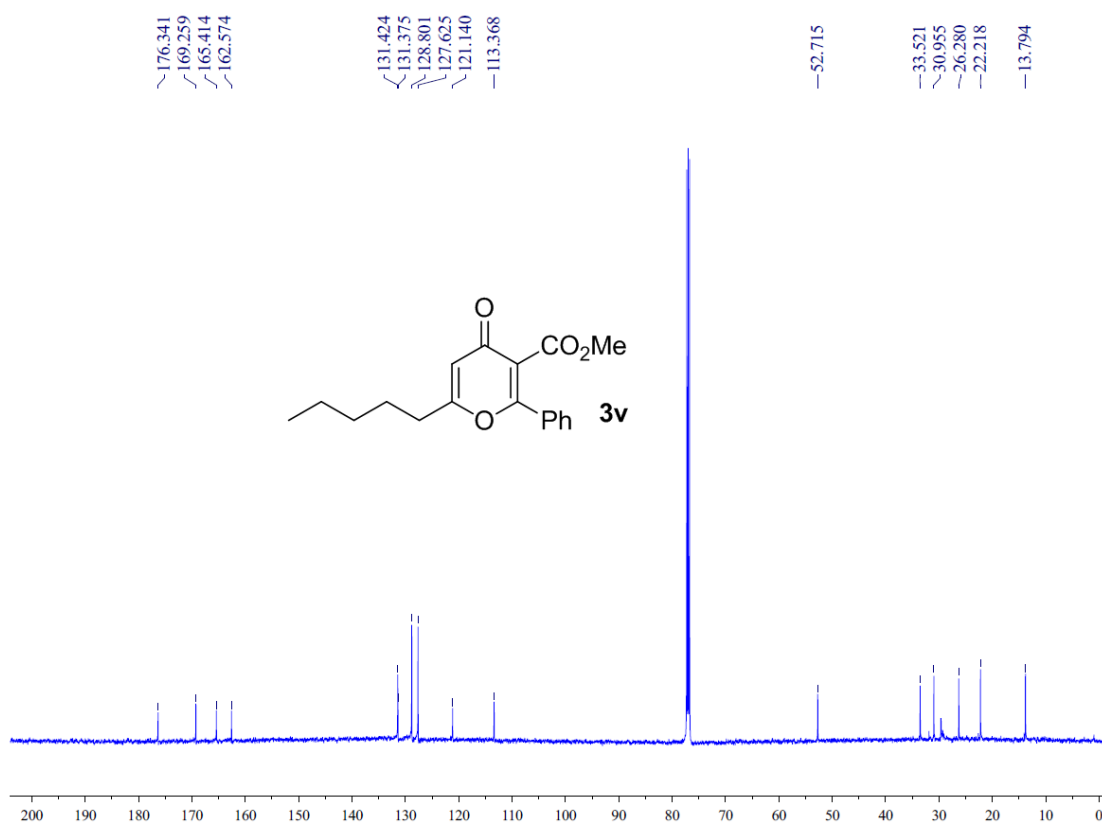

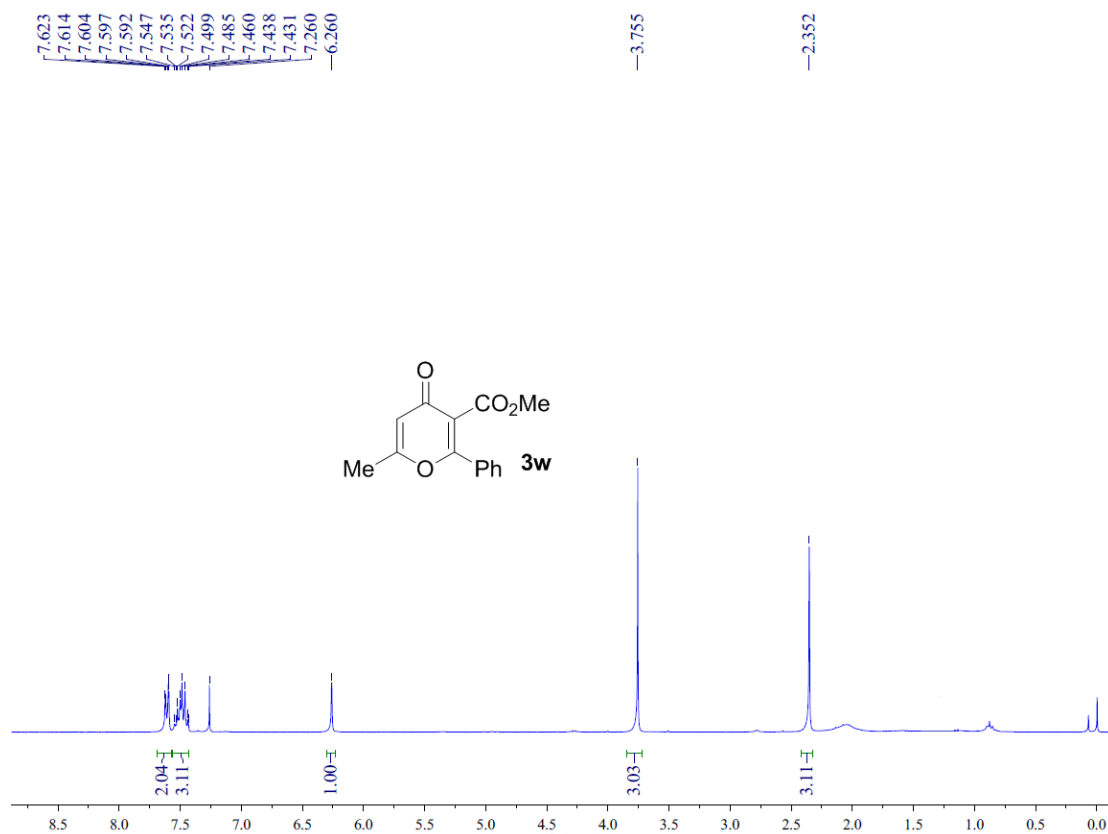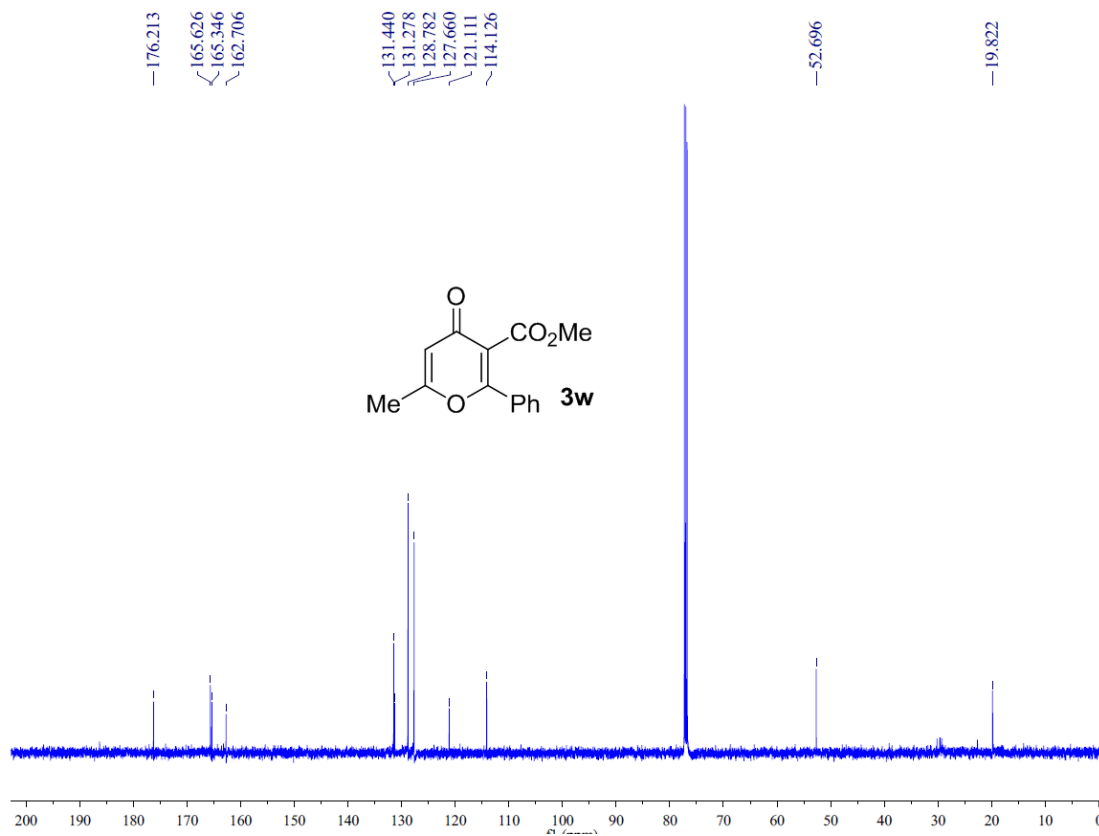

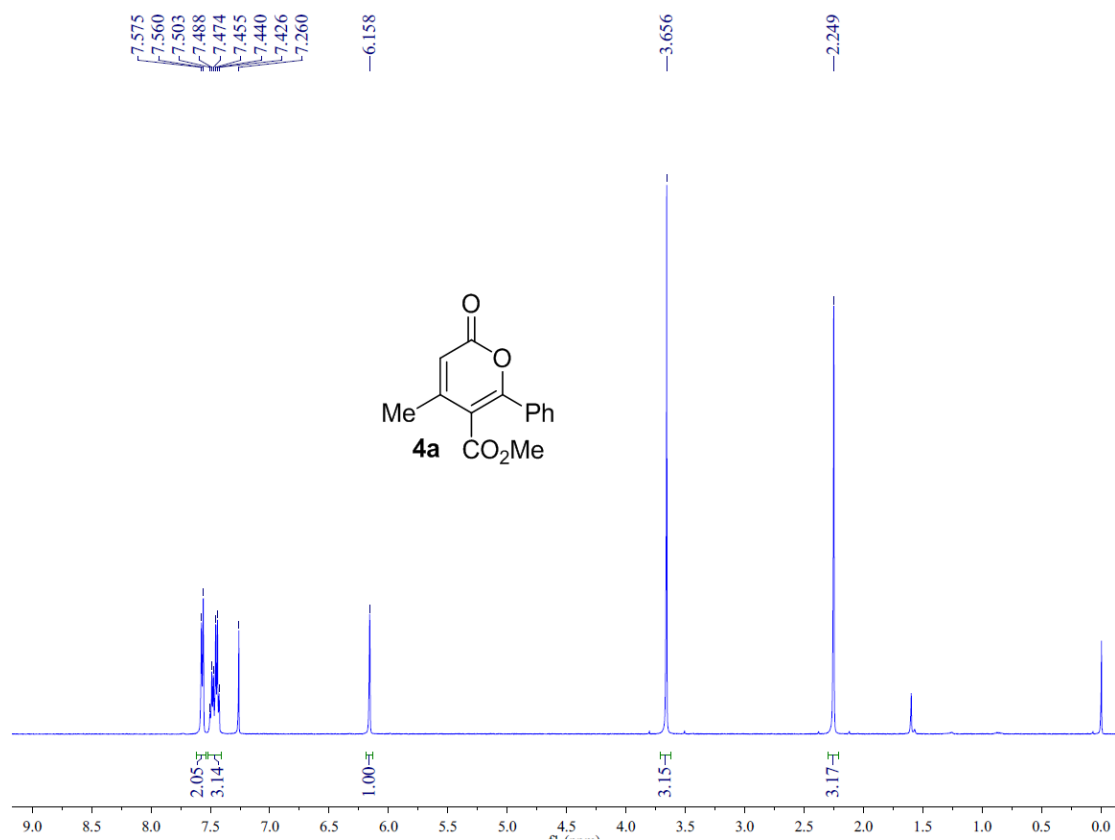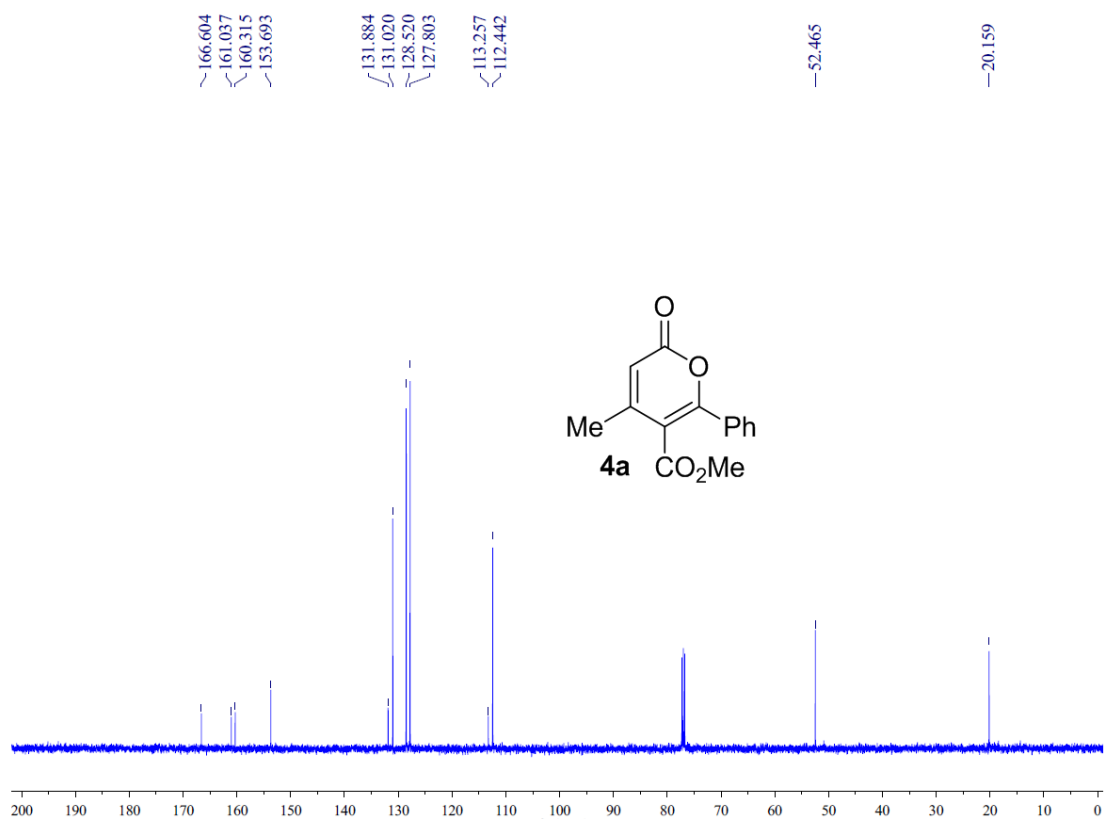

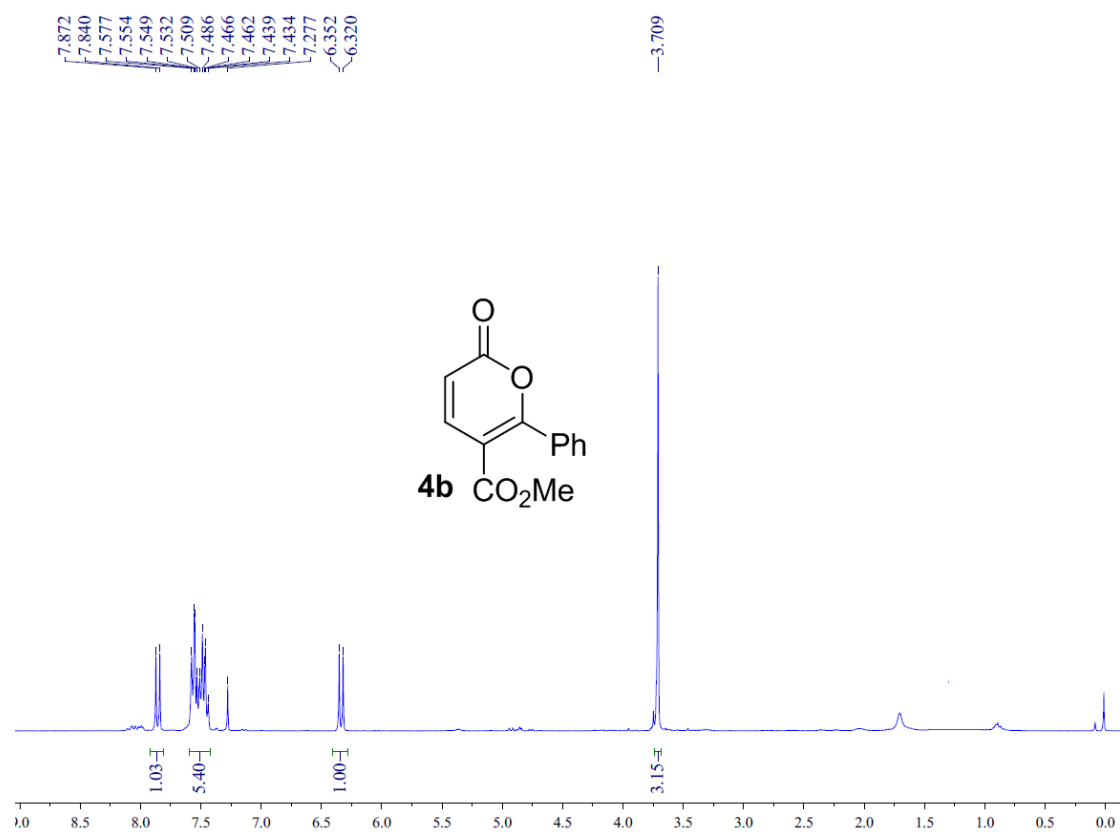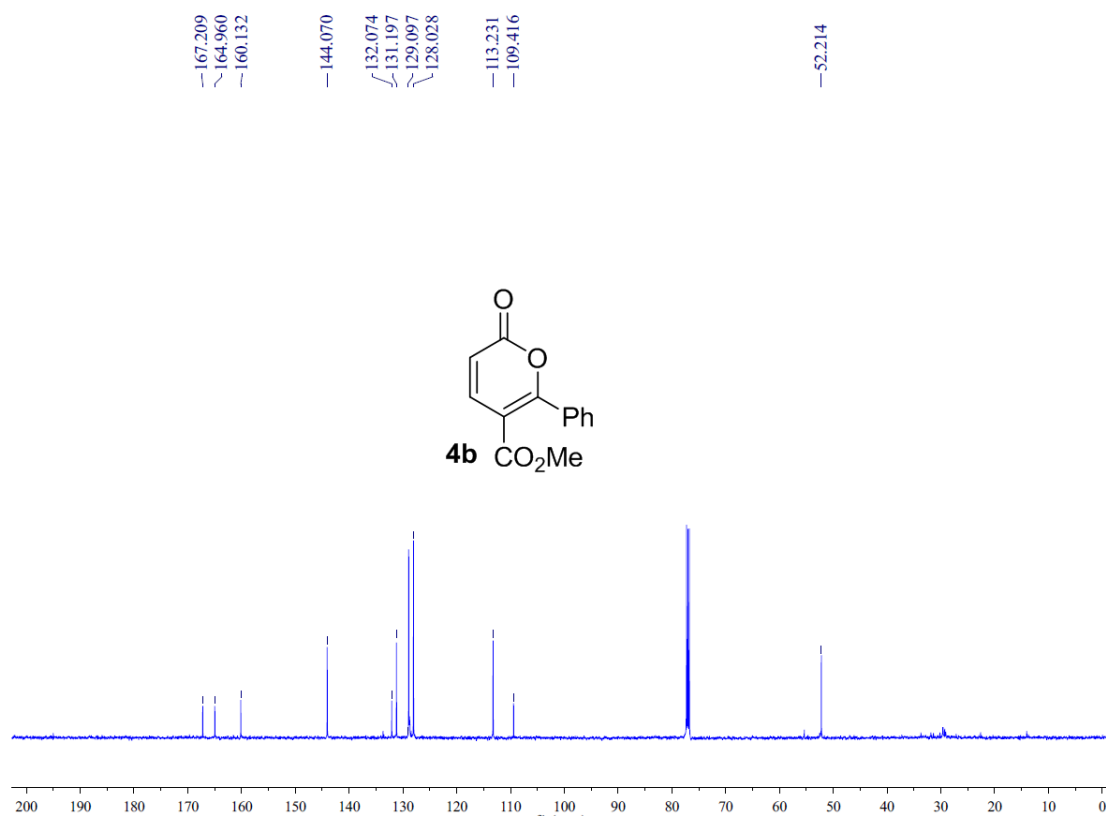

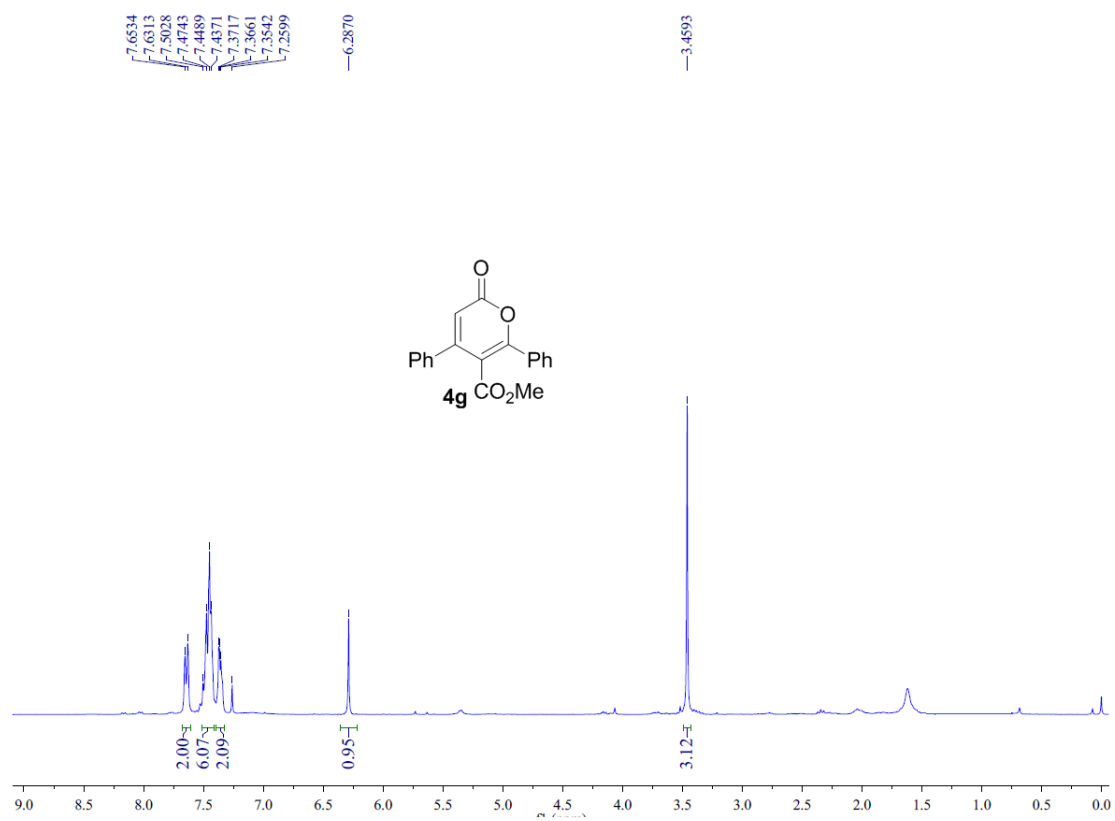

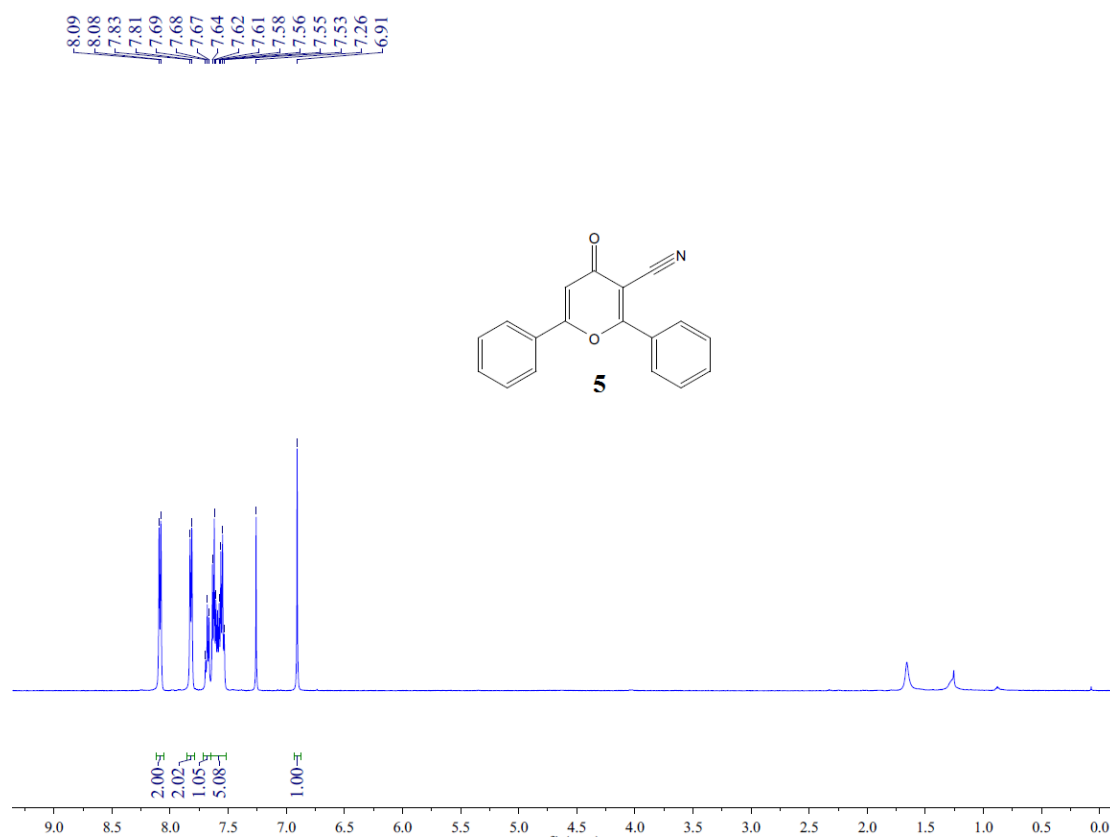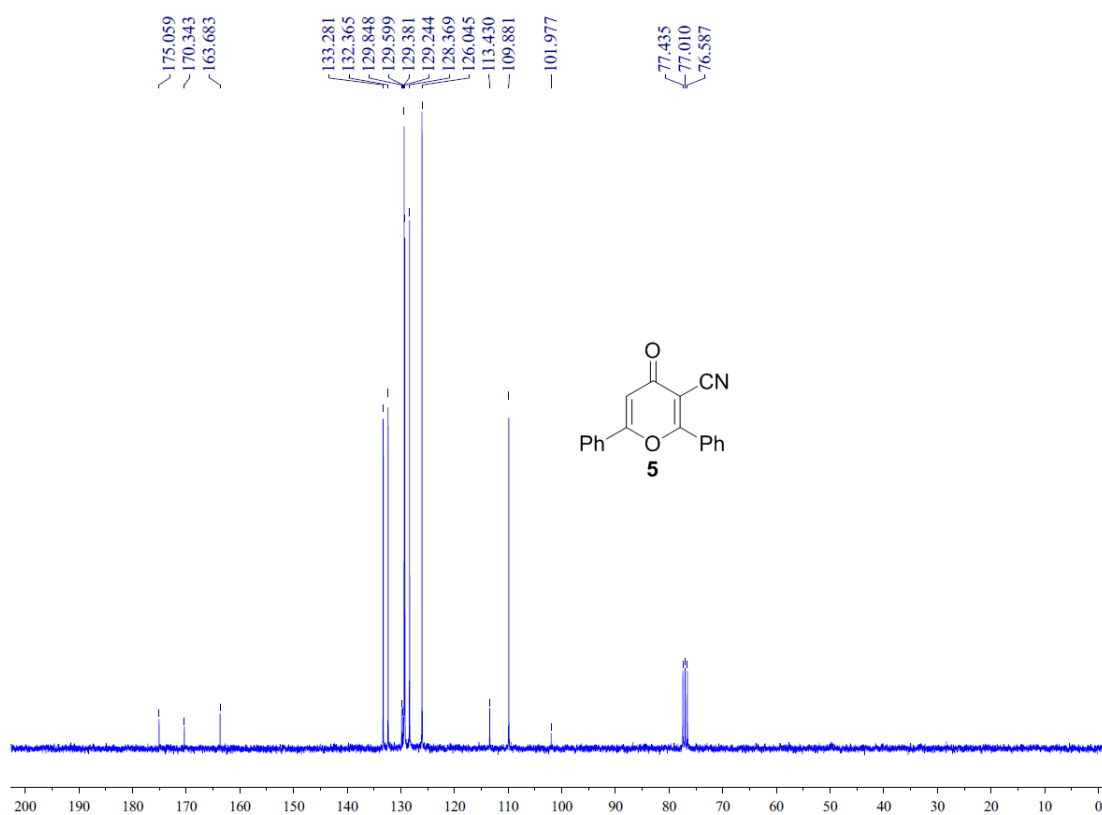

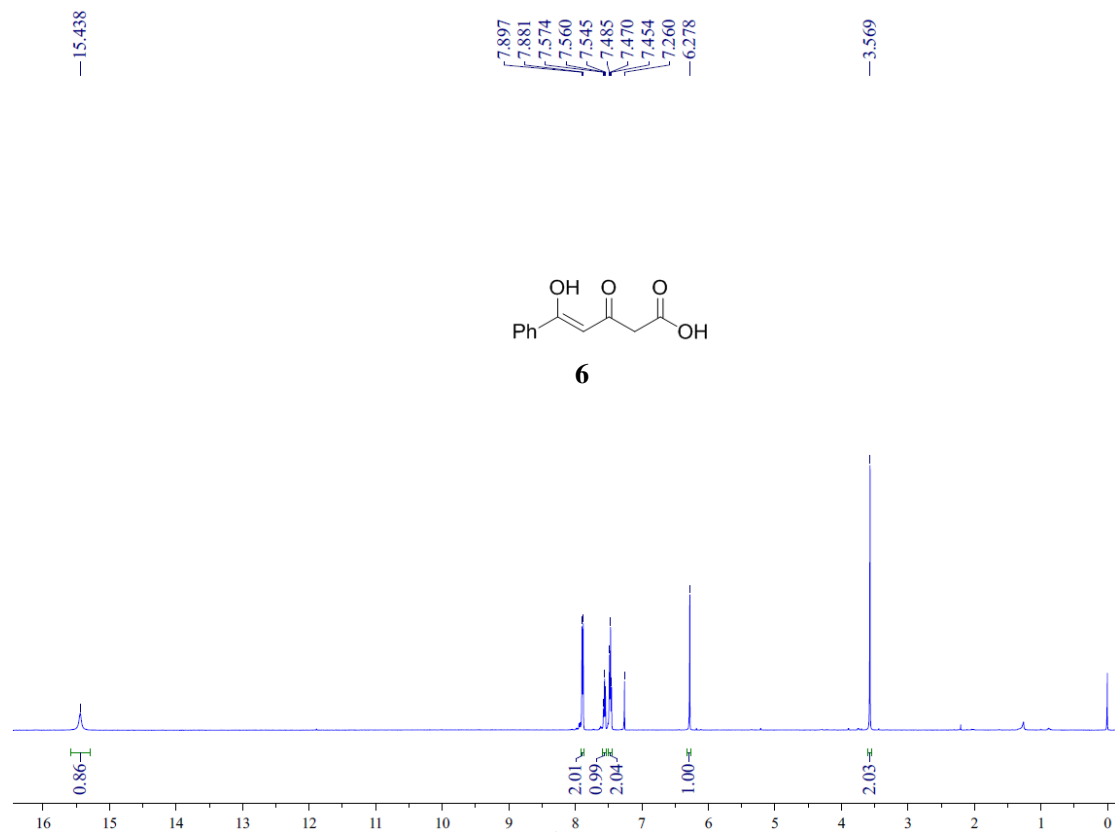

7.840  
7.817  
7.813  
7.688  
7.665  
7.660  
7.611  
7.604  
7.586  
7.581  
7.557  
7.536  
7.514  
7.508  
7.260  
7.110

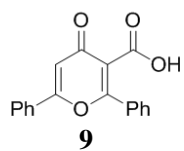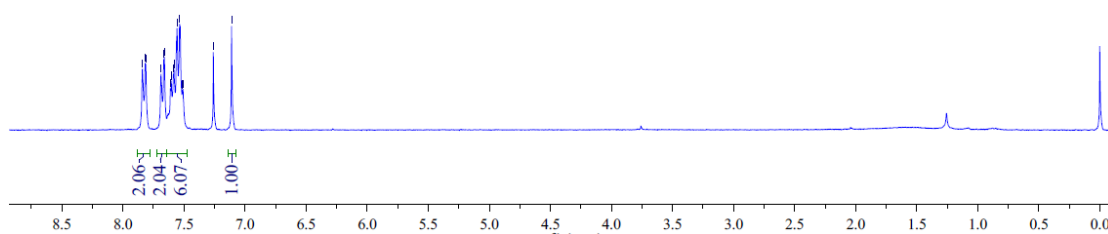

181.966  
173.179  
165.006  
163.064  
132.829  
131.872  
131.753  
129.445  
129.305  
128.212  
126.332  
113.411  
110.173

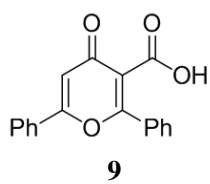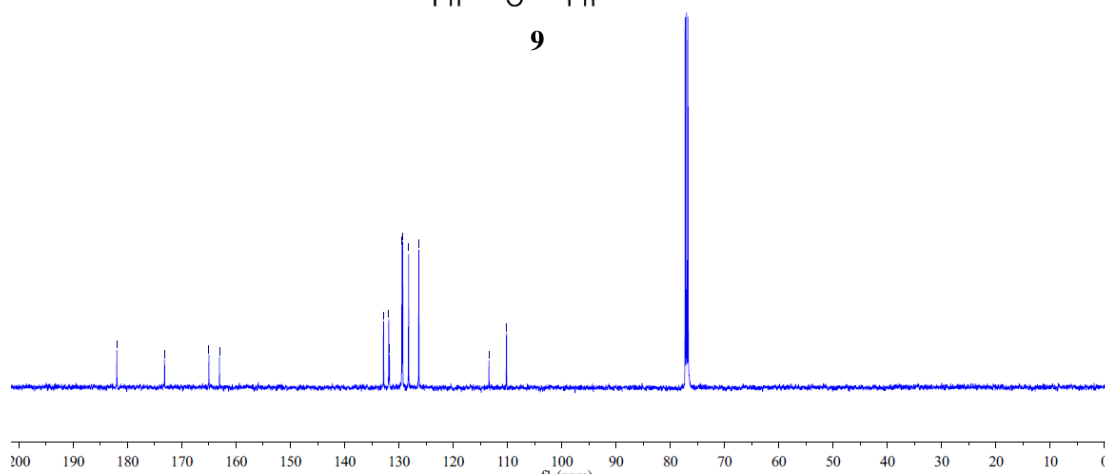

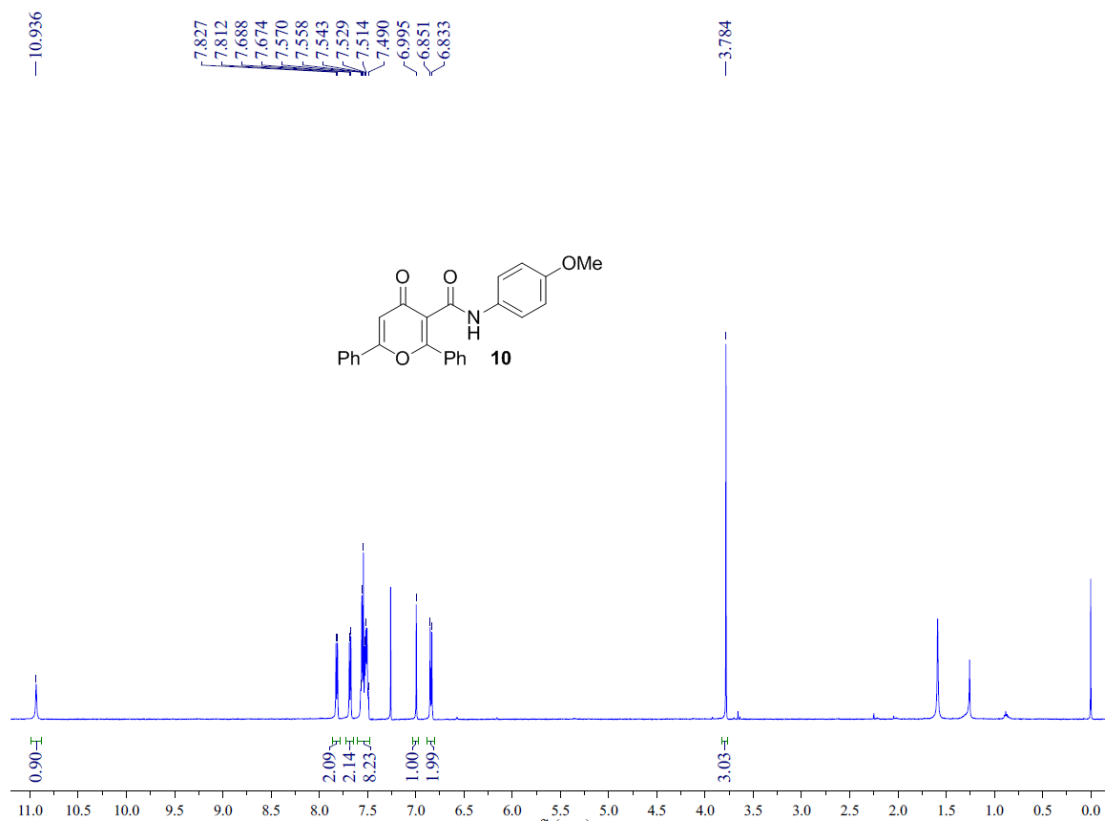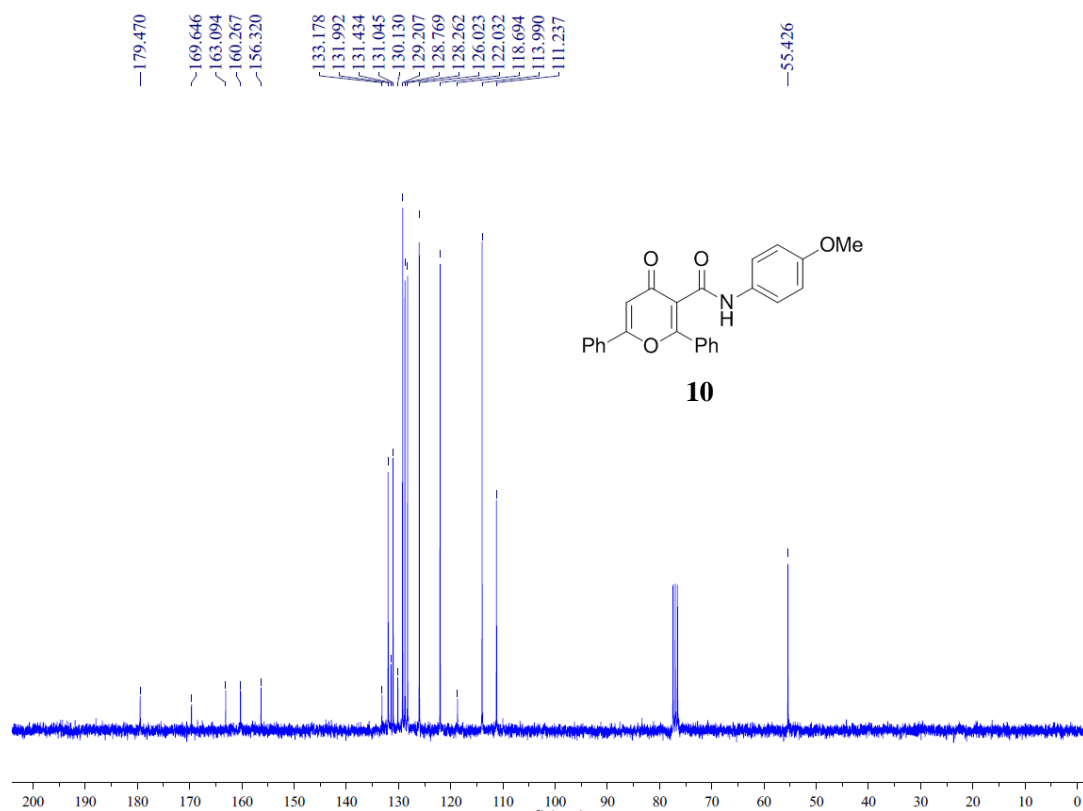

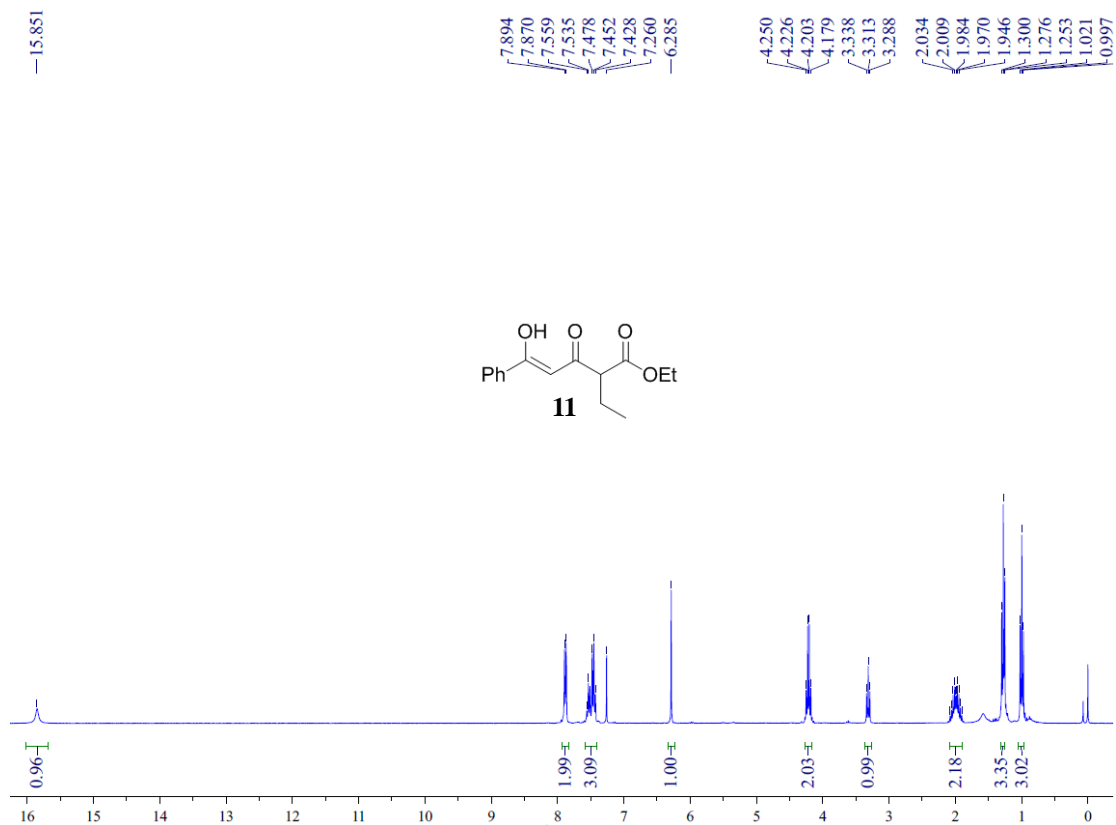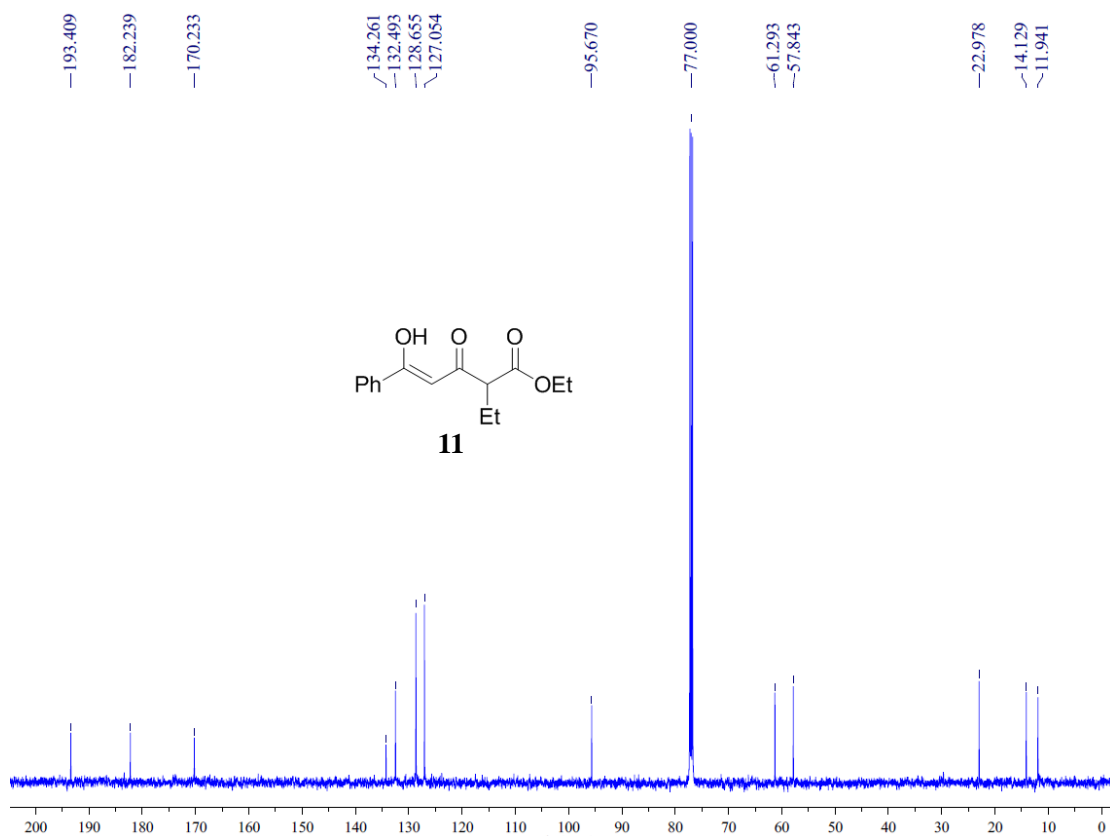

Supplement: Supplementary file 1 [file 5525618]
